# Supplementary material for: The genomic road to invasion—examining the similarities and differences in the genomes of associated oral pre-cancer and cancer samples
Source: PubMed Central journal article supplement (PMC5461742; doi:10.1186/s13073-017-0442-0), 2017-06-07
Supplement: 13073_2017_442_MOESM1_ESM.pdf [file 13073_2017_442_MOESM1_ESM.pdf]

**Supplementary information for Wood *et al*: The genomic road to invasion – examining the similarities and differences in the genomes of associated oral pre-cancer and cancer samples**

Figure S1 - Tissue sections of PG038 to illustrate regions chosen for micro-dissection. Stained sections were examined by microscopy and the regions of interest were marked by one of the study pathologists (top row). The bottom row shows the highlighted regions at higher magnification, indicating normal tissue, low grade dysplasia and invasive carcinoma.

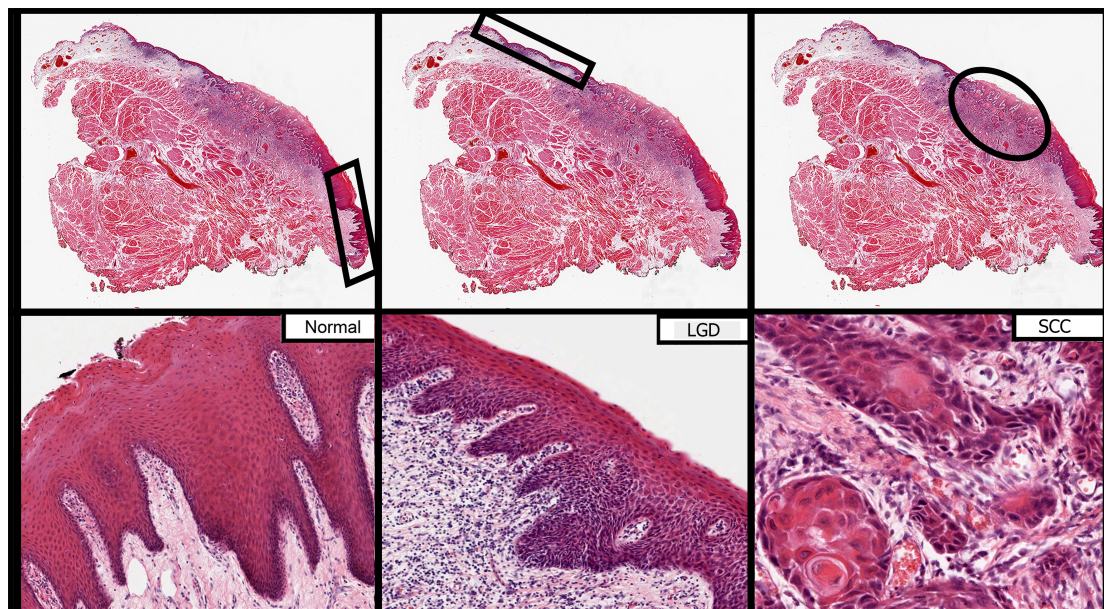

Table S1 – Details of all samples used for CNA analysis. Displayed are patient ID, unique sample ID, sample grade (LGD, HGD or SCC) and whether any other samples from the same patient were taken from the same block.

| <b>patient</b> | <b>sample_ID</b> | <b>histology</b> | <b>adjacent</b> |
|----------------|------------------|------------------|-----------------|
| PG001          | 1TZ              | LGD              | none            |
| PG001          | 1U3              | LGD              | 1U1             |
| PG001          | 1U1              | HGD              | 1U3             |
| PG001          | 1U5              | SCC              | none            |
| PG002          | 1U7              | HGD              | none            |
| PG002          | 1U9              | HGD              | none            |
| PG003          | 1UB              | LGD              | 1UD             |
| PG003          | 1UD              | HGD              | 1UB             |
| PG004          | 1UX              | LGD              | 1UV             |
| PG004          | 1UV              | LGD              | 1UX             |
| PG004          | 1UP              | SCC              | none            |
| PG004          | 1UT              | SCC              | none            |
| PG004          | 1UZ              | SCC              | none            |
| PG004          | 1V3              | SCC              | none            |
| PG005          | 349              | HGD              | none            |
| PG006          | 34R              | LGD              | none            |
| PG009          | 34S              | HGD              | 34T             |
| PG009          | 34T              | SCC              | 34S             |
| PG011          | 1VH              | HGD              | none            |
| PG011          | 1VJ              | HGD              | none            |
| PG013          | 1VM              | LGD              | none            |
| PG013          | 34U              | HGD              | 1VL             |
| PG013          | 1VL              | SCC              | 34U             |
| PG016          | 34V              | LGD              | none            |
| PG016          | 34W              | LGD              | 2DF,34X         |
| PG016          | 34X              | HGD              | 2DF,34W         |
| PG016          | 13C              | SCC              | none            |
| PG016          | 2DF              | SCC              | 34W,34X         |
| PG019          | 2ZB              | HGD              | 2ZC,08N         |
| PG019          | 2ZC              | SCC              | 08N,2ZB         |
| PG019          | 08N              | SCC              | 2ZC,2ZB         |
| PG019          | 2ZE              | SCC              | none            |
| PG019          | 099              | SCC              | none            |
| PG019          | 097              | SCC              | none            |
| PG019          | 2ZF              | SCC              | none            |
| PG019          | 08H              | HGD              | 08J             |
| PG019          | 08J              | SCC              | 08H             |
| PG019          | 13T              | SCC              | none            |
| PG019          | 08S              | SCC              | none            |
| PG019          | 08V              | SCC              | none            |

|       |     |     |         |
|-------|-----|-----|---------|
| PG019 | 08X | SCC | 2YE     |
| PG019 | 2YE | SCC | 08X     |
| PG019 | 08K | HGD | 094     |
| PG019 | 094 | HGD | 08K     |
| PG022 | 3DZ | LGD | none    |
| PG022 | 13X | LGD | none    |
| PG022 | 13W | LGD | none    |
| PG022 | 3DV | HGD | none    |
| PG022 | 3DX | HGD | 3DY     |
| PG022 | 3DR | HGD | none    |
| PG022 | 13V | HGD | none    |
| PG022 | 3DT | SCC | none    |
| PG022 | 3DU | SCC | none    |
| PG022 | 3DW | SCC | none    |
| PG022 | 3DY | SCC | 3DX     |
| PG024 | 2DS | LGD | none    |
| PG025 | 33S | HGD | 3BX     |
| PG025 | 3BX | SCC | 33S     |
| PG030 | 2ES | SCC | none    |
| PG030 | 07P | SCC | none    |
| PG030 | 07Q | SCC | none    |
| PG030 | 07S | SCC | none    |
| PG030 | 09A | SCC | none    |
| PG030 | 07Y | SCC | none    |
| PG030 | 227 | SCC | none    |
| PG030 | 22C | SCC | none    |
| PG032 | 2EX | LGD | none    |
| PG032 | 2DT | SCC | none    |
| PG032 | 2DV | SCC | none    |
| PG033 | 2S1 | LGD | none    |
| PG033 | 2RX | HGD | none    |
| PG033 | 2RZ | HGD | 2S0     |
| PG033 | 2RY | SCC | none    |
| PG033 | 2S0 | SCC | 2RZ     |
| PG033 | 2S4 | SCC | none    |
| PG033 | 35N | SCC | 35P     |
| PG033 | 35P | SCC | 35N     |
| PG036 | 351 | HGD | 2DW,350 |
| PG036 | 2DW | SCC | 350,351 |
| PG036 | 350 | SCC | 2DW,351 |
| PG038 | 2DZ | LGD | 2E0     |
| PG038 | 2DX | HGD | 2DY     |
| PG038 | 2DY | SCC | 2DX     |
| PG038 | 2E0 | SCC | 2DZ     |
| PG043 | 2SB | LGD | none    |
| PG043 | 2SA | HGD | none    |

|       |     |     |         |
|-------|-----|-----|---------|
| PG043 | 2S9 | SCC | none    |
| PG044 | 34D | LGD | 34E     |
| PG044 | 34E | LGD | 34D     |
| PG044 | 34C | HGD | none    |
| PG044 | 2E1 | SCC | 354     |
| PG044 | 354 | SCC | 2E1     |
| PG047 | 2SZ | LGD | none    |
| PG047 | 2SY | SCC | none    |
| PG047 | 2T0 | SCC | none    |
| PG055 | 080 | SCC | none    |
| PG055 | 083 | SCC | none    |
| PG055 | 085 | SCC | none    |
| PG055 | 14G | SCC | none    |
| PG056 | 355 | LGD | 34F,34G |
| PG056 | 34F | HGD | 34G,355 |
| PG056 | 34G | HGD | 34F,355 |
| PG059 | 357 | HGD | 2E4     |
| PG059 | 2E4 | SCC | 357     |
| PG062 | 2TC | HGD | 2TD     |
| PG062 | 2TA | SCC | 2TB     |
| PG062 | 2TB | SCC | 2TA     |
| PG062 | 2TD | SCC | 2TC     |
| PG063 | 359 | LGD | none    |
| PG063 | 2E6 | SCC | none    |
| PG068 | 2TH | HGD | 2TJ     |
| PG068 | 2T6 | SCC | 2T7     |
| PG068 | 2T7 | SCC | 2T6     |
| PG068 | 2TJ | SCC | 2TH     |
| PG070 | 2TN | LGD | none    |
| PG070 | 2TK | SCC | none    |
| PG070 | 2TM | SCC | none    |
| PG071 | 2E7 | HGD | 2E8     |
| PG071 | 2E8 | SCC | 2E7     |
| PG072 | 3BU | HGD | 2TP     |
| PG072 | 2TP | SCC | 3BU     |
| PG072 | 2TT | SCC | none    |
| PG073 | 33V | SCC | none    |
| PG075 | 3C0 | HGD | none    |
| PG075 | 2TX | SCC | none    |
| PG075 | 2TZ | SCC | none    |
| PG079 | 3Q2 | HGD | 3Q3     |
| PG079 | 3Q3 | SCC | 3Q2     |
| PG079 | 2EA | SCC | none    |
| PG083 | 2EL | HGD | 2EM     |
| PG083 | 2F8 | HGD | 2F7     |
| PG083 | 0D1 | SCC | none    |



|       |     |     |         |
|-------|-----|-----|---------|
| PG083 | 2EM | SCC | 2EL     |
| PG083 | 2F4 | SCC | none    |
| PG083 | 2F6 | SCC | none    |
| PG083 | 2F7 | SCC | 2F8     |
| PG083 | 2F3 | SCC | none    |
| PG085 | 32Z | HGD | none    |
| PG086 | 2SG | LGD | none    |
| PG086 | 2SD | HGD | 2SE     |
| PG086 | 2SE | SCC | 2SD     |
| PG086 | 2SF | SCC | none    |
| PG086 | 14M | SCC | none    |
| PG103 | 332 | SCC | 333     |
| PG103 | 333 | SCC | 332     |
| PG103 | 336 | SCC | none    |
| PG103 | 338 | SCC | none    |
| PG105 | 2FK | LGD | none    |
| PG105 | 2FE | HGD | 2FF     |
| PG105 | 2FH | HGD | 2FJ     |
| PG105 | 14P | SCC | none    |
| PG105 | 2FF | SCC | 2FE     |
| PG105 | 2FJ | SCC | 2FH     |
| PG108 | 2FL | HGD | none    |
| PG108 | 2FM | HGD | 2FN     |
| PG108 | 2FN | SCC | 2FM     |
| PG109 | 2FQ | LGD | 2FR     |
| PG109 | 2FR | LGD | 2FQ     |
| PG109 | 2FS | LGD | 2FT     |
| PG109 | 2FU | HGD | none    |
| PG109 | 2FT | SCC | 2FS     |
| PG110 | 33B | LGD | none    |
| PG110 | 339 | SCC | 33A     |
| PG110 | 33A | SCC | 339     |
| PG118 | 2FZ | SCC | none    |
| PG122 | 3PY | HGD | 3PZ     |
| PG122 | 3PZ | SCC | 3PY     |
| PG122 | 2G8 | SCC | none    |
| PG123 | 3PU | LGD | 2KB,3PW |
| PG123 | 3PW | SCC | 2KB,3PU |
| PG123 | 2K9 | SCC | 2KA     |
| PG123 | 2KA | SCC | 2K9     |
| PG123 | 2KB | SCC | 3PU,3PW |
| PG129 | 2KD | HGD | 2KE,2KF |
| PG129 | 2KE | HGD | 2KD,2KF |
| PG129 | 2KF | SCC | 2KD,2KE |
| PG130 | 2KJ | HGD | 2KK     |
| PG130 | 2KK | HGD | 2KJ     |

|       |     |     |             |
|-------|-----|-----|-------------|
| PG130 | 2KM | HGD | none        |
| PG130 | 2KN | SCC | none        |
| PG132 | 344 | HGD | none        |
| PG132 | 343 | SCC | none        |
| PG132 | 345 | SCC | none        |
| PG132 | 347 | SCC | none        |
| PG136 | 086 | SCC | none        |
| PG136 | 08B | SCC | none        |
| PG137 | 2L4 | LGD | none        |
| PG137 | 3Q0 | HGD | 2L3,3Q1     |
| PG137 | 3Q1 | SCC | 2L3,3Q0     |
| PG137 | 2L1 | SCC | none        |
| PG137 | 2L3 | SCC | 3Q0,3Q1     |
| PG137 | 2L5 | SCC | none        |
| PG137 | 0D7 | SCC | none        |
| PG139 | 2LD | LGD | 2LC         |
| PG139 | 2LF | HGD | none        |
| PG139 | 2L8 | SCC | 2L9,35F     |
| PG139 | 2L9 | SCC | 2L8,35F     |
| PG139 | 2LC | SCC | 2LD         |
| PG139 | 2LG | SCC | none        |
| PG139 | 35F | SCC | 2L8,2L9     |
| PG141 | 35G | HGD | 0DF,2LJ     |
| PG141 | 35J | HGD | 2LK,35H     |
| PG141 | 0DF | SCC | 2LJ,35G     |
| PG141 | 2LJ | SCC | 0DF,35G     |
| PG141 | 2LK | SCC | 35H,35J     |
| PG141 | 2LM | SCC | none        |
| PG141 | 35H | SCC | 2LK,35J     |
| PG144 | 2LU | LGD | none        |
| PG144 | 2LT | SCC | none        |
| PG146 | 2LX | LGD | none        |
| PG146 | 2LV | SCC | none        |
| PG146 | 2LY | SCC | none        |
| PG149 | 2LZ | HGD | none        |
| PG149 | 2M0 | HGD | 1F6,2M1     |
| PG149 | 1F6 | SCC | 2M0,2M1     |
| PG149 | 2M1 | SCC | 1F6,2M0     |
| PG150 | 2M2 | LGD | none        |
| PG156 | 2M7 | HGD | 2M8         |
| PG156 | 2M8 | SCC | 2M7         |
| PG156 | 2M9 | SCC | 2MA         |
| PG156 | 2MA | SCC | 2M9         |
| PG164 | 2ST | HGD | 2SS         |
| PG164 | 2SQ | SCC | none        |
| PG164 | 2SR | SCC | 35S,35T,35U |

|       |     |     |             |
|-------|-----|-----|-------------|
| PG164 | 2SS | SCC | 2ST         |
| PG164 | 35T | SCC | 2SR,35S,35U |
| PG164 | 35U | SCC | 2SR,35S,35T |
| PG164 | 35S | SCC | 2SR,35T,35U |
| PG175 | 2MT | LGD | none        |
| PG175 | 2MP | SCC | none        |
| PG180 | 2MU | SCC | none        |
| PG187 | 2MZ | HGD | none        |
| PG187 | 34L | HGD | 34M,3EL     |
| PG187 | 34M | HGD | 34L,3EL     |
| PG187 | 3EK | HGD | none        |
| PG187 | 3EL | SCC | 34L,34M     |
| PG187 | 2N0 | SCC | none        |
| PG188 | 2N1 | HGD | 2N2,2N3     |
| PG188 | 2N2 | HGD | 2N1,2N3     |
| PG188 | 2N3 | HGD | 2N1,2N2     |
| PG190 | 2R8 | HGD | none        |
| PG190 | 2R9 | HGD | none        |
| PG190 | 2R7 | SCC | none        |
| PG192 | 2RB | HGD | 2RC,2RD     |
| PG192 | 2RC | HGD | 2RB,2RD     |
| PG192 | 2RD | SCC | 2RB,2RC     |
| PG192 | 2RE | SCC | none        |
| PG195 | 2RH | LGD | 2RJ         |
| PG195 | 2RG | SCC | none        |
| PG195 | 2RJ | SCC | 2RH         |
| PG195 | 2RK | SCC | none        |
| PG196 | 2RM | LGD | none        |
| PG197 | 2RP | HGD | none        |
| PG197 | 2RQ | SCC | none        |
| PG199 | 2RU | HGD | none        |
| PG199 | 35L | HGD | none        |
| PG200 | 2RV | HGD | none        |
| PG200 | 2RW | SCC | none        |

Table S2 – Exome sequencing statistics. Displayed for each sample, are the number of reads, aligned reads, bases sequenced, median on-target coverage, the number of mismatches (total mismatches, not just called mutations), the number of mismatches per base, the number of C>T (or G>A) mismatches, the C>T (G>A) mismatch rate per base, and per mismatch. The number of mismatches and proportion of those which are C>T(G>A) are known to be a way of measuring damage by formalin fixation.

| Name        | Reads    | Aligned  | Bases    | Median coverage | Mismatches | Mismatches per base | C>T      | C>T per base | C>T per mismatch |
|-------------|----------|----------|----------|-----------------|------------|---------------------|----------|--------------|------------------|
| PG004-blood | 3.89E+07 | 3.83E+07 | 3.05E+09 | 91              | 3.68E+06   | 1.21E-03            | 1.13E+06 | 3.71E-04     | 0.31             |
| PG004-dys   | 6.29E+07 | 5.81E+07 | 4.38E+09 | 95              | 1.17E+07   | 2.68E-03            | 4.34E+06 | 9.92E-04     | 0.37             |
| PG004-SCC   | 8.78E+07 | 8.61E+07 | 6.72E+09 | 97              | 9.69E+06   | 1.44E-03            | 3.47E+06 | 5.16E-04     | 0.36             |
| PG038-blood | 7.87E+07 | 7.79E+07 | 6.43E+09 | 166             | 7.69E+06   | 1.20E-03            | 2.21E+06 | 3.45E-04     | 0.29             |
| PG038-dys   | 1.05E+08 | 9.85E+07 | 7.28E+09 | 171             | 1.52E+07   | 2.08E-03            | 5.29E+06 | 7.26E-04     | 0.35             |
| PG038-SCC   | 9.54E+07 | 9.33E+07 | 7.09E+09 | 169             | 9.02E+06   | 1.27E-03            | 3.16E+06 | 4.45E-04     | 0.35             |
| PG049-blood | 8.27E+07 | 8.19E+07 | 6.58E+09 | 177             | 7.78E+06   | 1.18E-03            | 2.38E+06 | 3.62E-04     | 0.31             |
| PG049-dys   | 7.87E+07 | 7.73E+07 | 5.93E+09 | 147             | 1.09E+07   | 1.84E-03            | 3.93E+06 | 6.63E-04     | 0.36             |
| PG049-SCC   | 9.71E+07 | 9.56E+07 | 7.39E+09 | 148             | 8.79E+06   | 1.19E-03            | 3.09E+06 | 4.18E-04     | 0.35             |
| PG063-blood | 6.36E+07 | 6.29E+07 | 5.02E+09 | 115             | 5.81E+06   | 1.16E-03            | 1.79E+06 | 3.57E-04     | 0.31             |
| PG063-dys   | 9.86E+07 | 9.73E+07 | 7.40E+09 | 132             | 8.78E+06   | 1.19E-03            | 3.16E+06 | 4.27E-04     | 0.36             |
| PG063-SCC   | 1.10E+08 | 1.08E+08 | 8.54E+09 | 132             | 1.04E+07   | 1.22E-03            | 3.69E+06 | 4.32E-04     | 0.35             |
| PG079-blood | 4.82E+07 | 4.76E+07 | 3.77E+09 | 86              | 4.42E+06   | 1.17E-03            | 1.34E+06 | 3.54E-04     | 0.30             |
| PG079-dys   | 9.57E+07 | 9.32E+07 | 6.99E+09 | 107             | 1.05E+07   | 1.50E-03            | 3.92E+06 | 5.61E-04     | 0.37             |
| PG079-SCC   | 1.05E+08 | 1.03E+08 | 7.75E+09 | 109             | 1.07E+07   | 1.38E-03            | 3.98E+06 | 5.14E-04     | 0.37             |
| PG105-blood | 8.55E+07 | 8.46E+07 | 6.98E+09 | 179             | 8.51E+06   | 1.22E-03            | 2.42E+06 | 3.46E-04     | 0.28             |
| PG105-dys   | 8.45E+07 | 8.20E+07 | 6.36E+09 | 159             | 1.04E+07   | 1.64E-03            | 3.65E+06 | 5.74E-04     | 0.35             |
| PG105-SCC   | 8.85E+07 | 8.72E+07 | 6.84E+09 | 160             | 7.99E+06   | 1.17E-03            | 2.67E+06 | 3.91E-04     | 0.33             |
| PG108-blood | 5.99E+07 | 5.93E+07 | 4.71E+09 | 133             | 5.48E+06   | 1.16E-03            | 1.67E+06 | 3.55E-04     | 0.31             |
| PG108-dys   | 8.71E+07 | 8.41E+07 | 6.34E+09 | 196             | 1.07E+07   | 1.68E-03            | 3.76E+06 | 5.92E-04     | 0.35             |
| PG108-SCC   | 1.08E+08 | 1.06E+08 | 8.08E+09 | 203             | 9.82E+06   | 1.22E-03            | 3.34E+06 | 4.14E-04     | 0.34             |
| PG122-blood | 5.32E+07 | 5.25E+07 | 4.19E+09 | 91              | 4.97E+06   | 1.19E-03            | 1.50E+06 | 3.58E-04     | 0.30             |
| PG122-dys   | 9.41E+07 | 9.26E+07 | 7.06E+09 | 116             | 9.31E+06   | 1.32E-03            | 3.30E+06 | 4.68E-04     | 0.35             |
| PG122-SCC   | 8.92E+07 | 8.79E+07 | 6.82E+09 | 118             | 8.77E+06   | 1.29E-03            | 3.05E+06 | 4.47E-04     | 0.35             |
| PG123-blood | 7.54E+07 | 7.46E+07 | 5.89E+09 | 159             | 7.42E+06   | 1.26E-03            | 2.20E+06 | 3.74E-04     | 0.30             |
| PG123-dys   | 1.06E+08 | 1.04E+08 | 8.18E+09 | 188             | 1.07E+07   | 1.31E-03            | 3.75E+06 | 4.58E-04     | 0.35             |
| PG123-SCC   | 8.26E+07 | 8.13E+07 | 6.22E+09 | 183             | 7.95E+06   | 1.28E-03            | 2.81E+06 | 4.51E-04     | 0.35             |
| PG129-blood | 6.76E+07 | 6.69E+07 | 5.30E+09 | 124             | 6.70E+06   | 1.26E-03            | 1.99E+06 | 3.75E-04     | 0.30             |
| PG129-dys   | 8.41E+07 | 8.21E+07 | 7.40E+09 | 93              | 1.31E+07   | 1.78E-03            | 4.48E+06 | 6.06E-04     | 0.34             |
| PG129-SCC   | 1.08E+08 | 1.06E+08 | 8.84E+09 | 94              | 1.19E+07   | 1.35E-03            | 3.99E+06 | 4.52E-04     | 0.34             |
| PG136-blood | 4.44E+07 | 4.38E+07 | 3.61E+09 | 75              | 4.38E+06   | 1.21E-03            | 1.33E+06 | 3.68E-04     | 0.30             |
| PG136-dys   | 8.40E+07 | 8.27E+07 | 6.55E+09 | 112             | 8.12E+06   | 1.24E-03            | 2.79E+06 | 4.25E-04     | 0.34             |
| PG136-SCC   | 7.82E+07 | 7.71E+07 | 6.02E+09 | 112             | 7.83E+06   | 1.30E-03            | 2.60E+06 | 4.32E-04     | 0.33             |
| PG137-blood | 5.00E+07 | 4.93E+07 | 3.97E+09 | 107             | 4.81E+06   | 1.21E-03            | 1.44E+06 | 3.61E-04     | 0.30             |
| PG137-dys   | 1.05E+08 | 1.03E+08 | 7.69E+09 | 116             | 1.07E+07   | 1.39E-03            | 3.94E+06 | 5.13E-04     | 0.37             |
| PG137-SCC   | 8.61E+07 | 8.43E+07 | 6.31E+09 | 114             | 8.81E+06   | 1.40E-03            | 3.24E+06 | 5.14E-04     | 0.37             |

|             |          |          |          |     |          |          |          |          |      |
|-------------|----------|----------|----------|-----|----------|----------|----------|----------|------|
| PG144-blood | 6.24E+07 | 6.16E+07 | 4.89E+09 | 140 | 6.12E+06 | 1.25E-03 | 1.85E+06 | 3.77E-04 | 0.30 |
| PG144-dys   | 5.16E+07 | 4.98E+07 | 4.42E+09 | 107 | 9.07E+06 | 2.05E-03 | 3.15E+06 | 7.13E-04 | 0.35 |
| PG144-SCC   | 7.55E+07 | 7.30E+07 | 6.58E+09 | 117 | 1.01E+07 | 1.53E-03 | 3.26E+06 | 4.95E-04 | 0.32 |
| PG174-blood | 5.00E+07 | 4.94E+07 | 4.11E+09 | 119 | 4.99E+06 | 1.22E-03 | 1.52E+06 | 3.71E-04 | 0.31 |
| PG174-dys   | 3.97E+07 | 3.84E+07 | 3.50E+09 | 37  | 6.39E+06 | 1.83E-03 | 2.25E+06 | 6.43E-04 | 0.35 |
| PG174-SCC   | 1.38E+08 | 1.36E+08 | 1.05E+10 | 44  | 1.40E+07 | 1.33E-03 | 4.69E+06 | 4.46E-04 | 0.33 |
| PG187-blood | 5.02E+07 | 4.94E+07 | 3.93E+09 | 123 | 4.69E+06 | 1.19E-03 | 1.42E+06 | 3.60E-04 | 0.30 |
| PG187-dys   | 5.53E+07 | 5.41E+07 | 4.35E+09 | 174 | 5.99E+06 | 1.38E-03 | 2.06E+06 | 4.74E-04 | 0.34 |
| PG187-SCC   | 9.82E+07 | 9.62E+07 | 7.38E+09 | 183 | 1.05E+07 | 1.42E-03 | 3.59E+06 | 4.86E-04 | 0.34 |
| PG192-blood | 3.76E+07 | 3.71E+07 | 3.00E+09 | 97  | 3.64E+06 | 1.21E-03 | 1.09E+06 | 3.63E-04 | 0.30 |
| PG192-dys   | 3.59E+07 | 3.25E+07 | 2.36E+09 | 39  | 3.48E+06 | 1.48E-03 | 1.43E+06 | 6.08E-04 | 0.41 |
| PG192-SCC   | 3.85E+07 | 3.30E+07 | 2.37E+09 | 35  | 4.60E+06 | 1.94E-03 | 1.80E+06 | 7.59E-04 | 0.39 |

Figure S2: - Confirmation of VAFs cutoffs used for exome data. From Wood *et al*, *J Pathol* 2015, **237**:296-306, 92 putative mutations called from exome data of seven HNSCC FFPE samples were validated using high coverage (>1000X) coverage sequencing of PCR products. Overall 13 false positives were discovered, of which five were from one sample (PG008), which presumably was of lower quality. If the proposed VAF cutoff of 0.12 was applied, overall the false positive rate was 0.056. Discarding the poor quality sample, the false positive rate reduced to 0.02 (1 of 47 calls).

## PCR confirmation of exome data

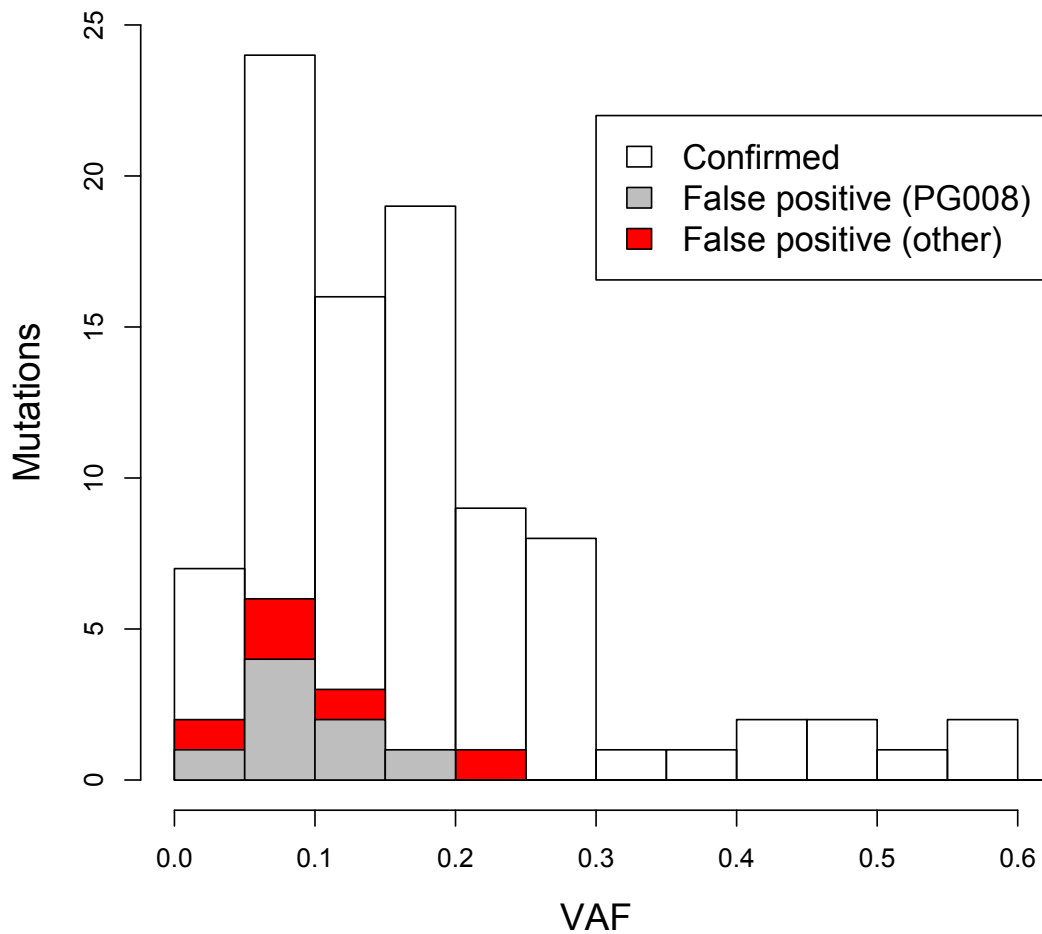

Figure S3: – Numbers of variants with basic filtering. Patients to the left of the dashed line had LGD, to the right HGD. Shades of orange indicate adjacent dysplasia – SCC pairs. Shades of blue indicate distant pairs. For each patient, the number of dysplasia only, shared and SCC only variants are shown.

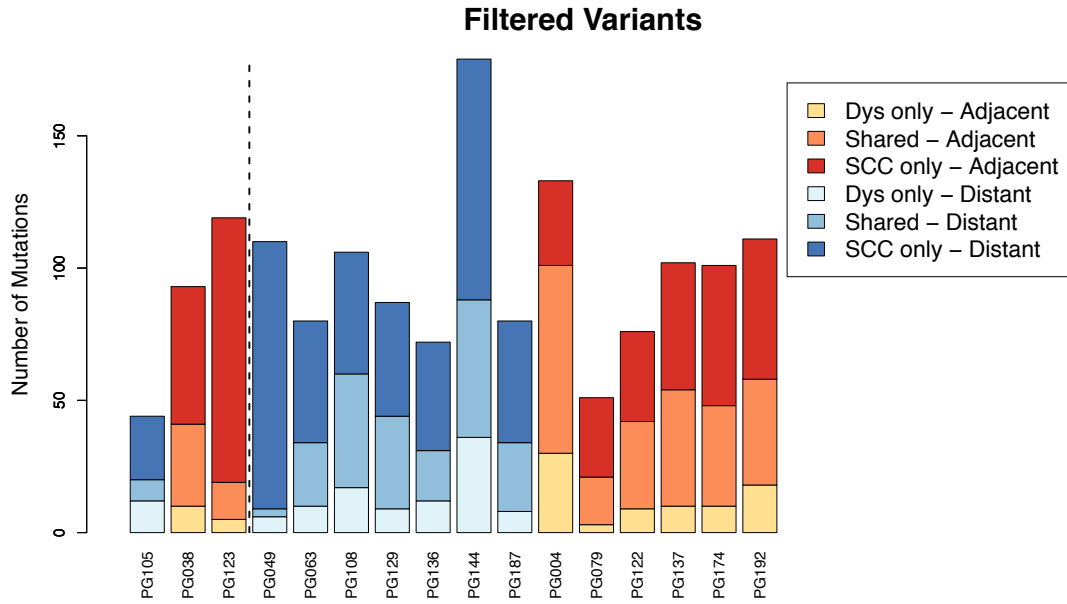

Figure S4 – The numbers of variants after filtering for cellularity and functional effect. Any gene mutated in three or more patients in displayed in the bottom portion of the figure. There are two rows for each gene. The top row indicates that it is mutated in dysplasia and the bottom row SCC. So for *TP53* for example, PG105 has a SCC only mutation, PG038 has a mutation which is shared, and PG123 has different mutations in the dysplasia and SCC sample.

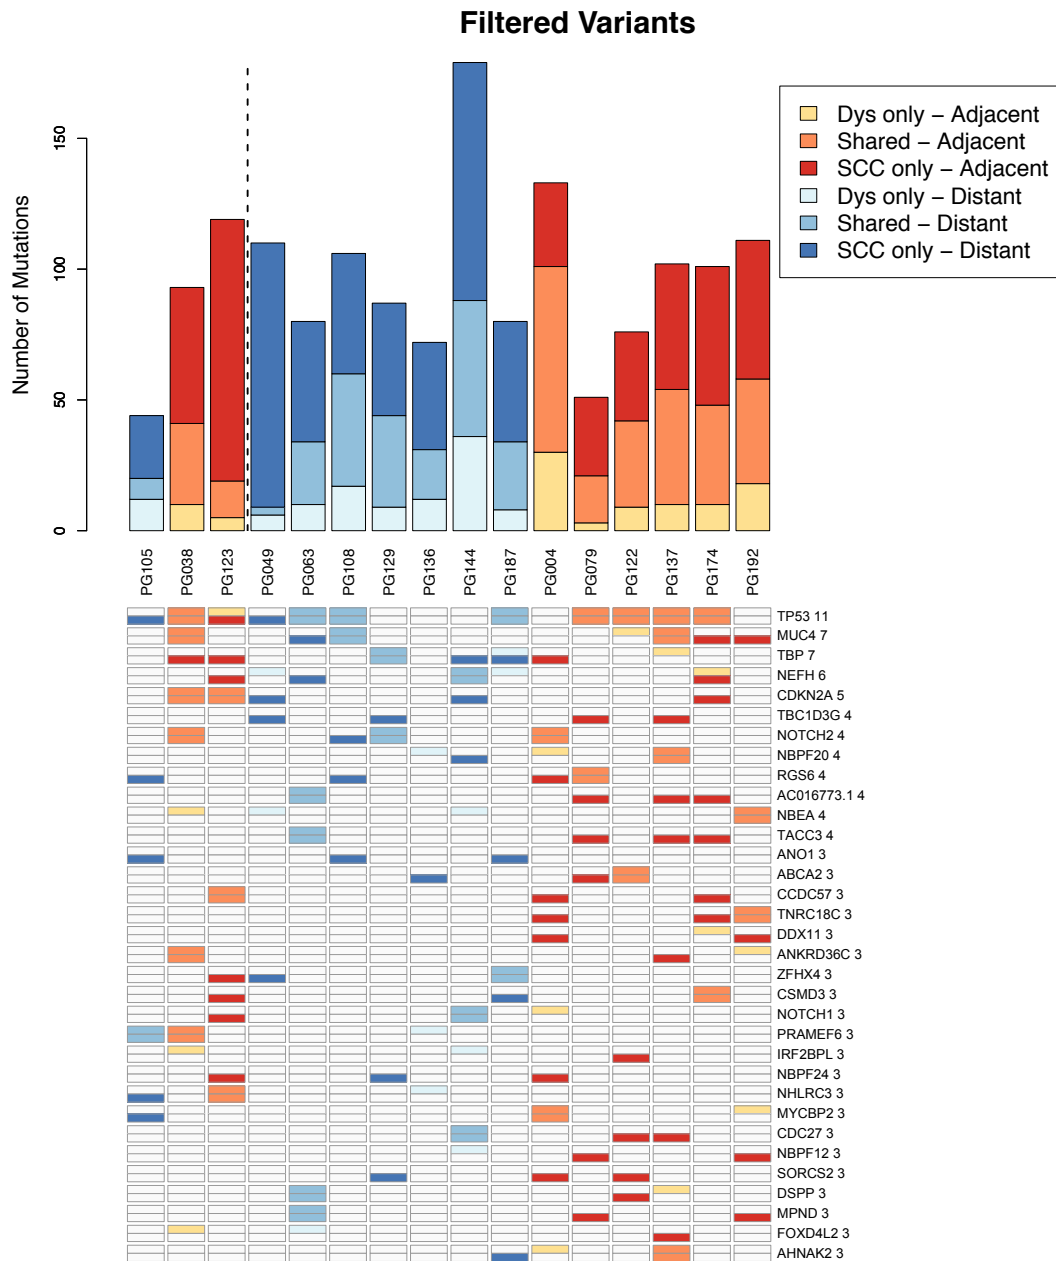



Figure S5: Comparison of shared mutation calls between and within samples. For every sample, the number of shared mutation calls with every other sample from the same and different patients was counted and the VAF noted. The calls are displayed in full, and over three different VAF ranges, showing that even at low VAFs, there were more calls shared within than between patients.

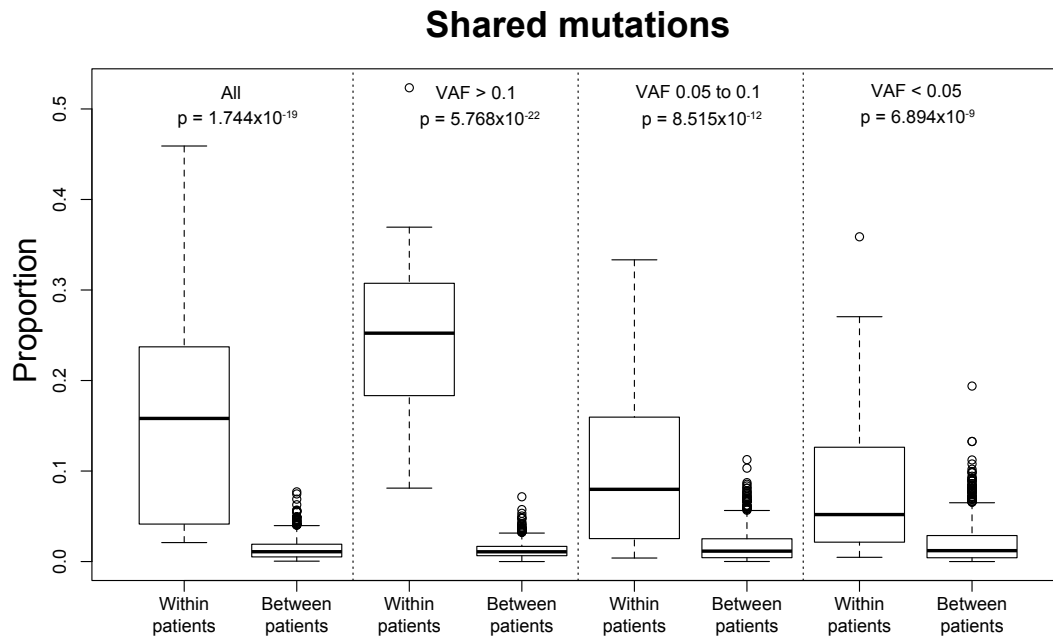

Figure S6 (following pages): Comparison of shared and private variant allele frequencies for all exome sequencing samples. For each patient, in the left plot, all putative mutations are displayed as SCC VAF versus dysplasia VAF. Private mutations are on the axes at  $x=0$  or  $y=0$ . To make the distributions of VAFs more visible, they are displayed as histograms in the right plots. On the left, the distribution of dysplasia VAFs are shown, with the shared mutations in red. On the right the SCC VAFs are shown. For many patients, there were high numbers of putative calls with very low VAFs which may be spurious, and which make the rest of the distribution difficult to see. Therefore, the bottom two plots replicate the top plots, but only with VAFs > 0.12. For each histogram, the p-value showing the likelihood of the shared and total distributions being the same is shown.

S6a: PG004

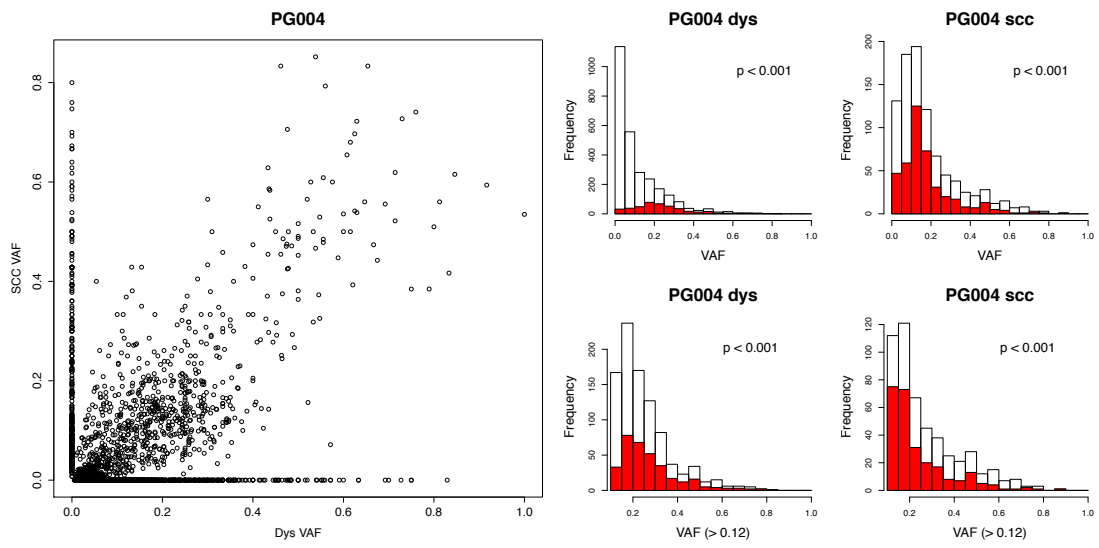

S6b: PG038

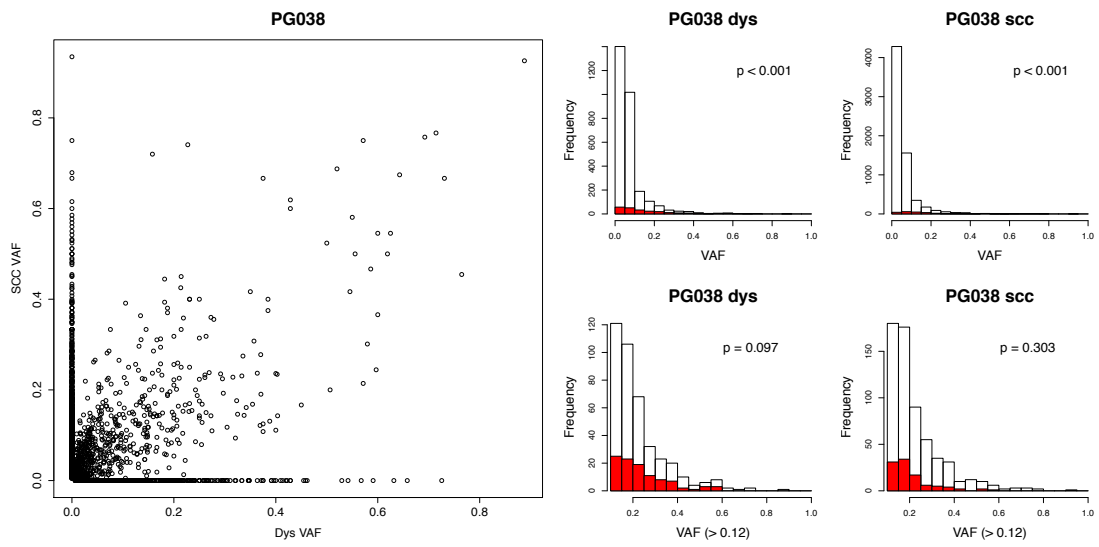

S6c: PG049

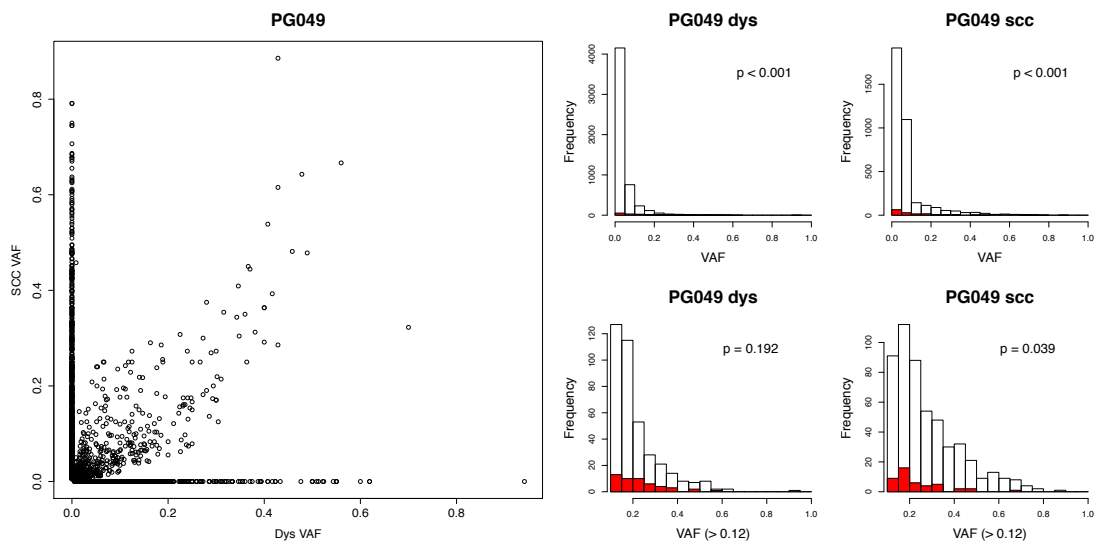

S6d: PG063

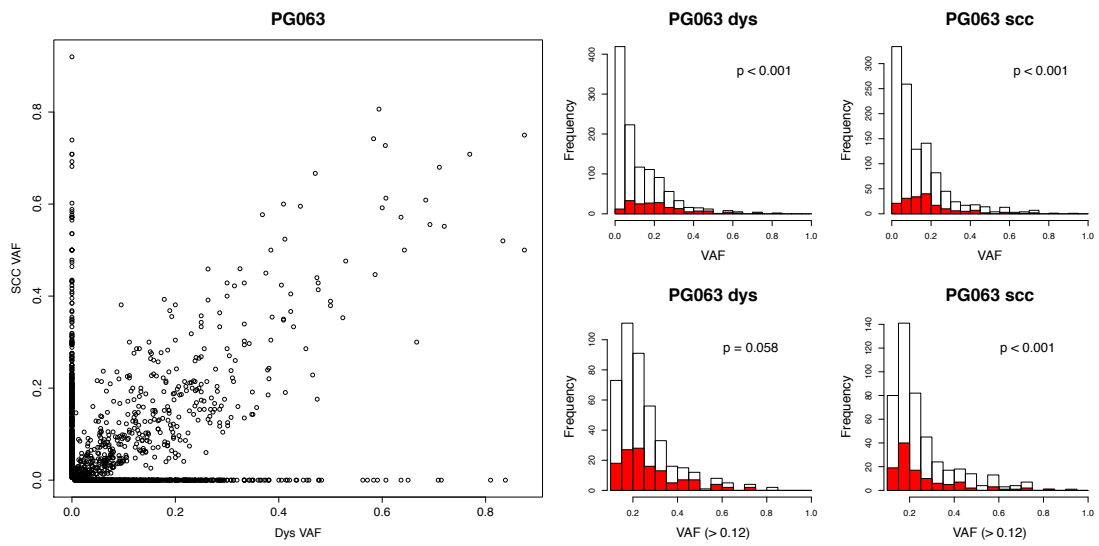

S6e: PG079

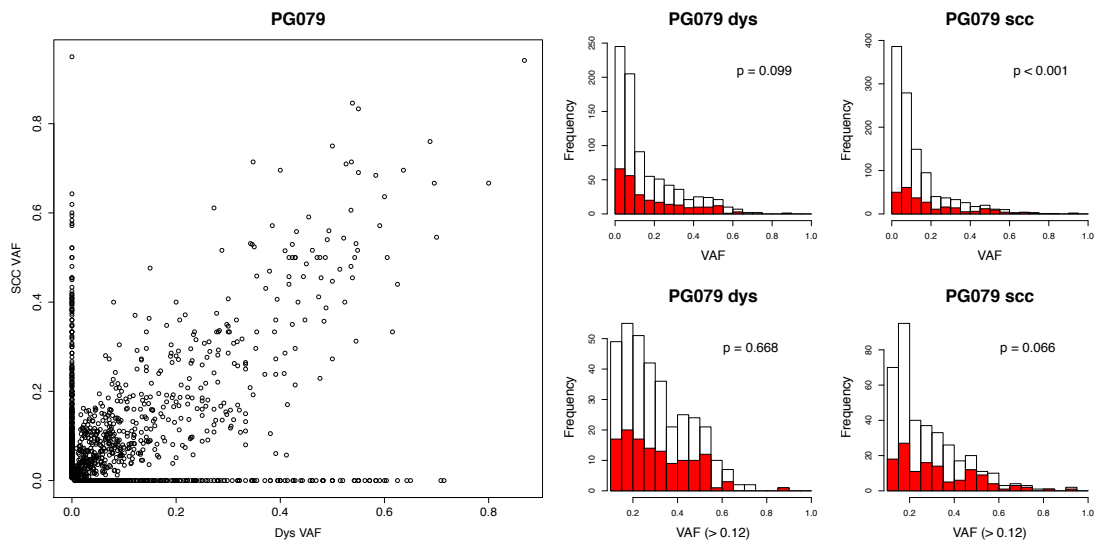

S6f: PG105

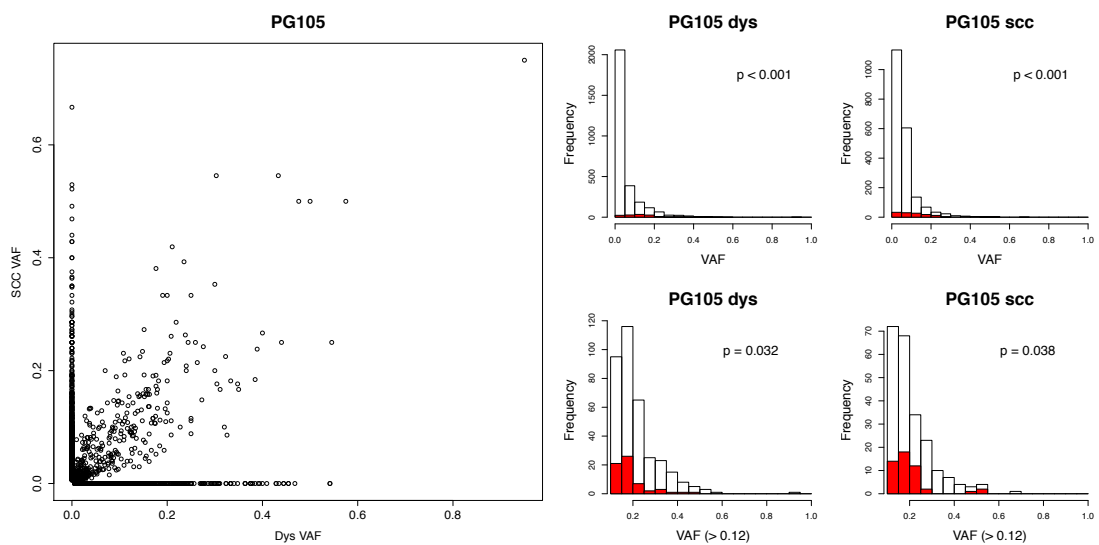

S6g: PG108

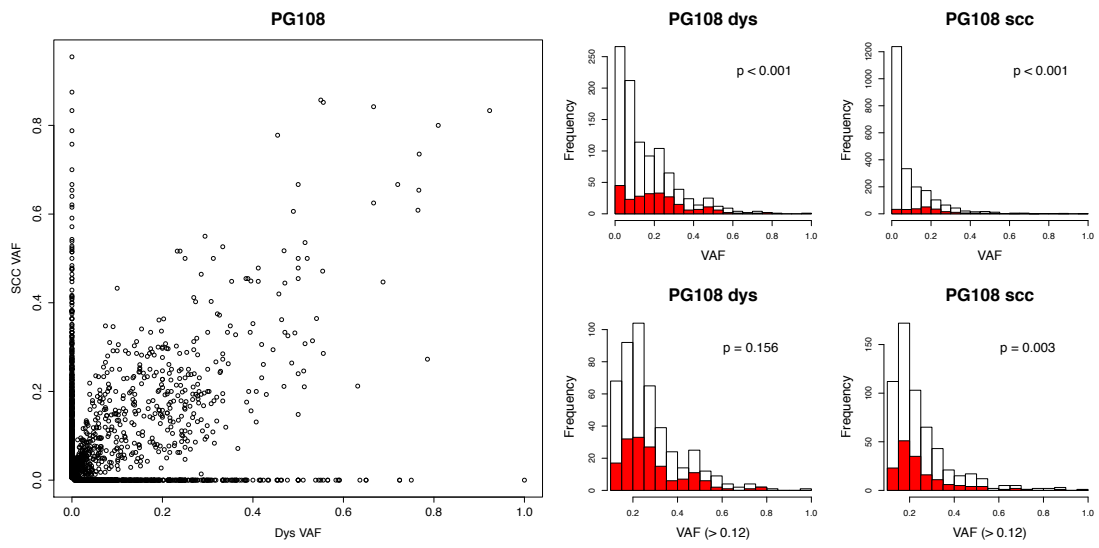

S6h: PG122

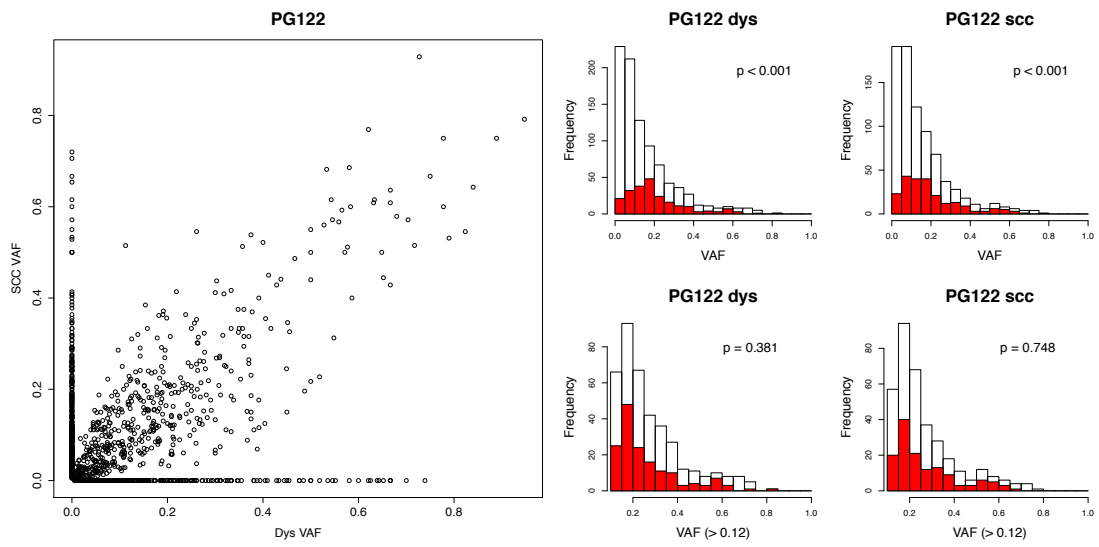

S6i: PG123

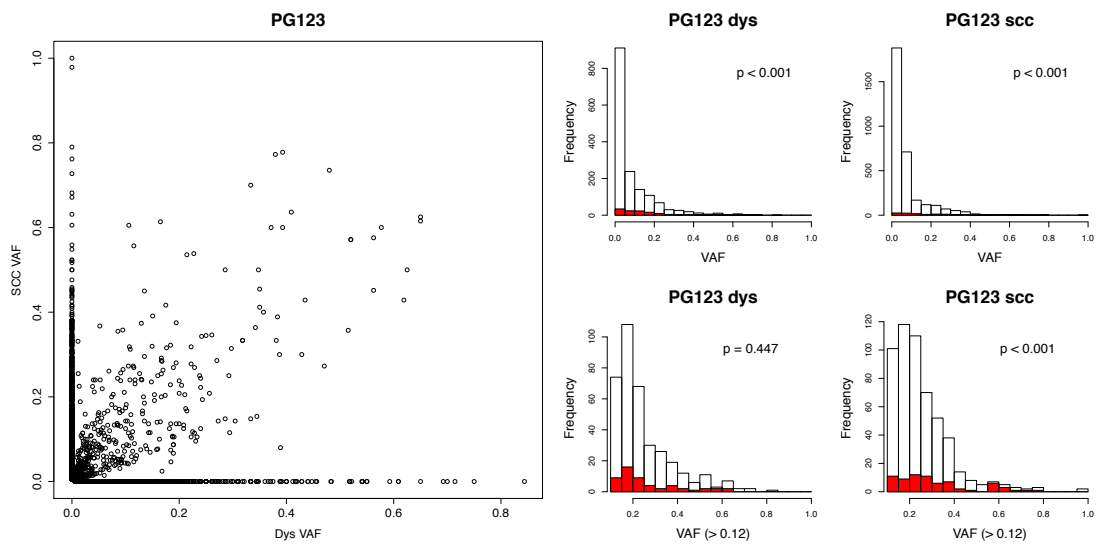

S6j: PG129

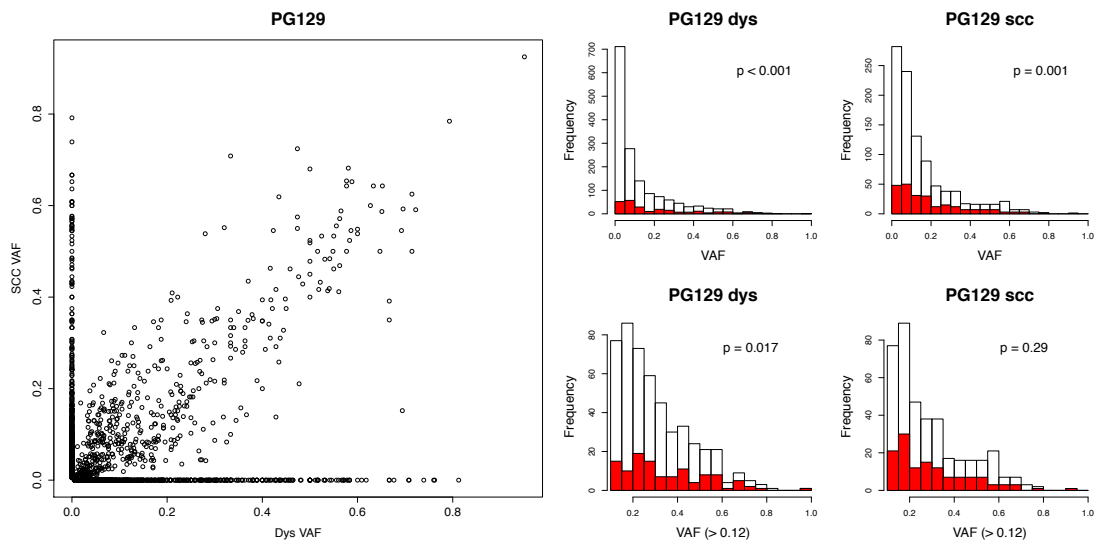

S6k: PG136

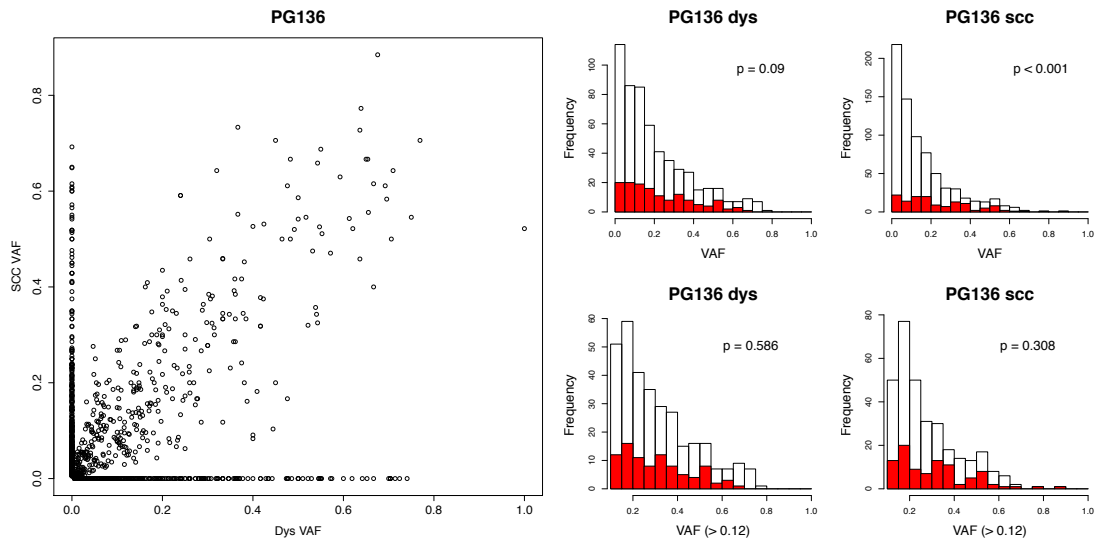

S6l: PG137

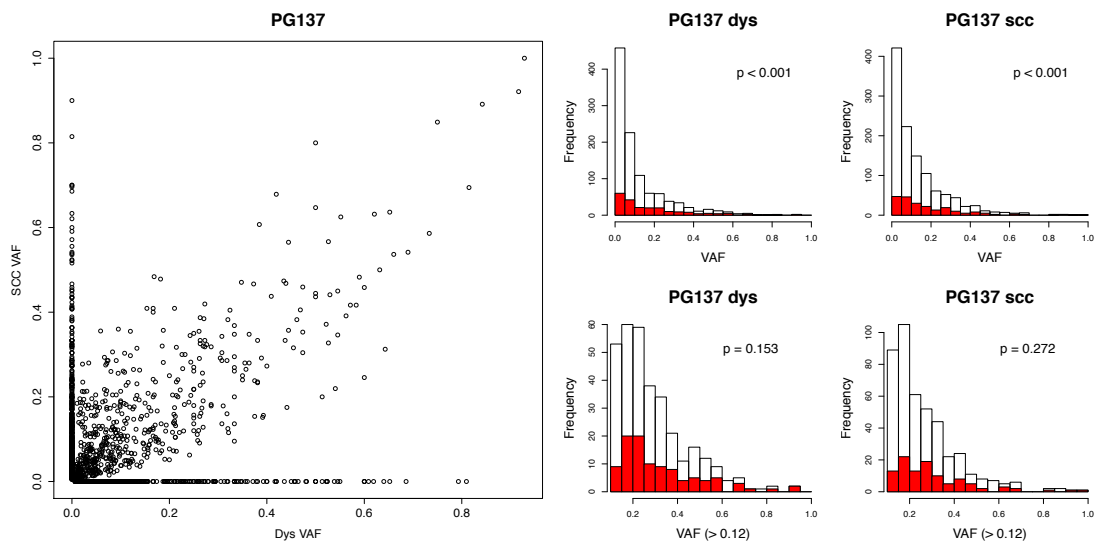

S6m: PG144

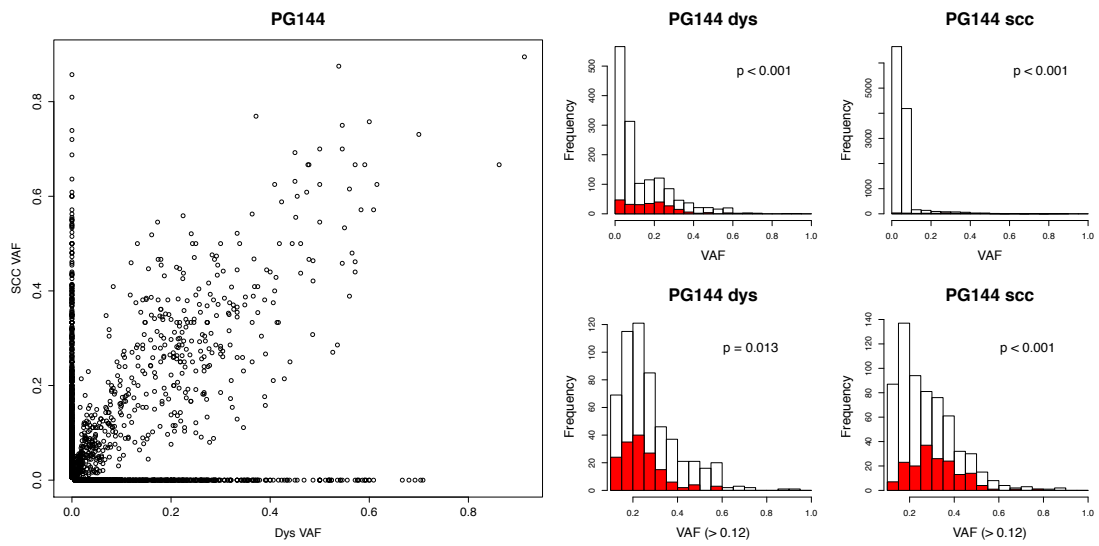

S6n: PG174

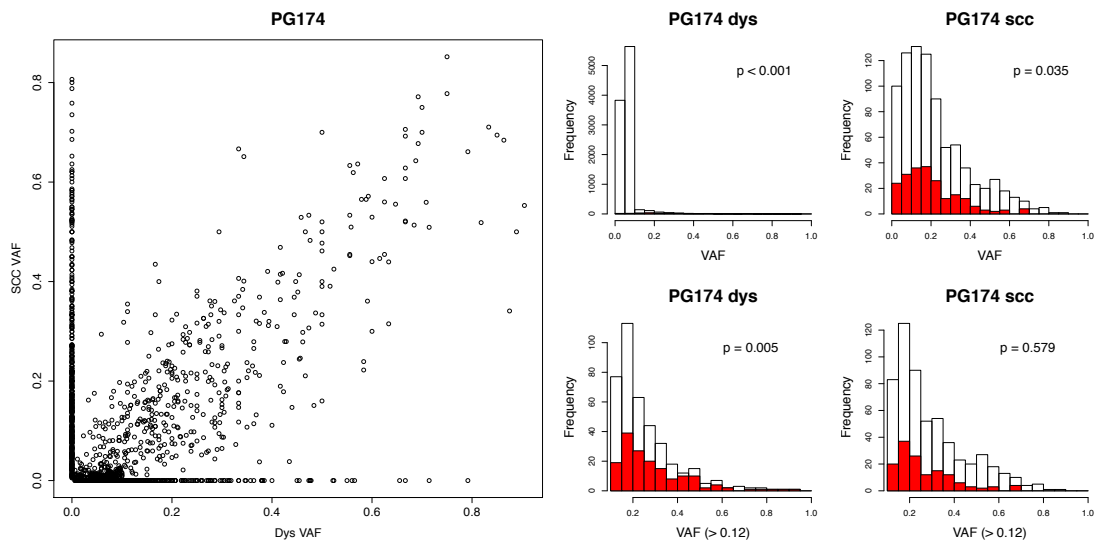

S6o: PG187

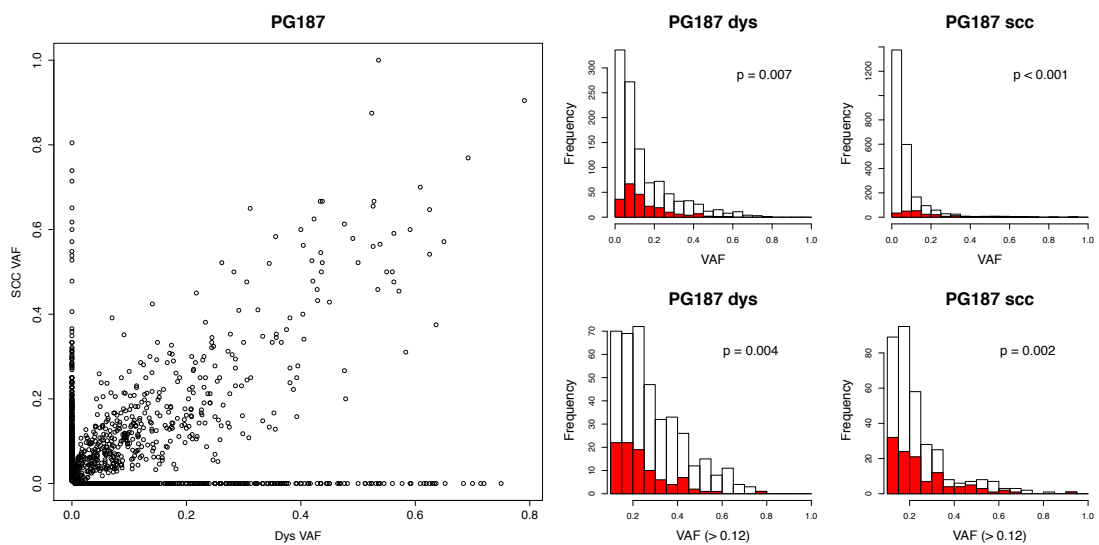

S6p: PG192

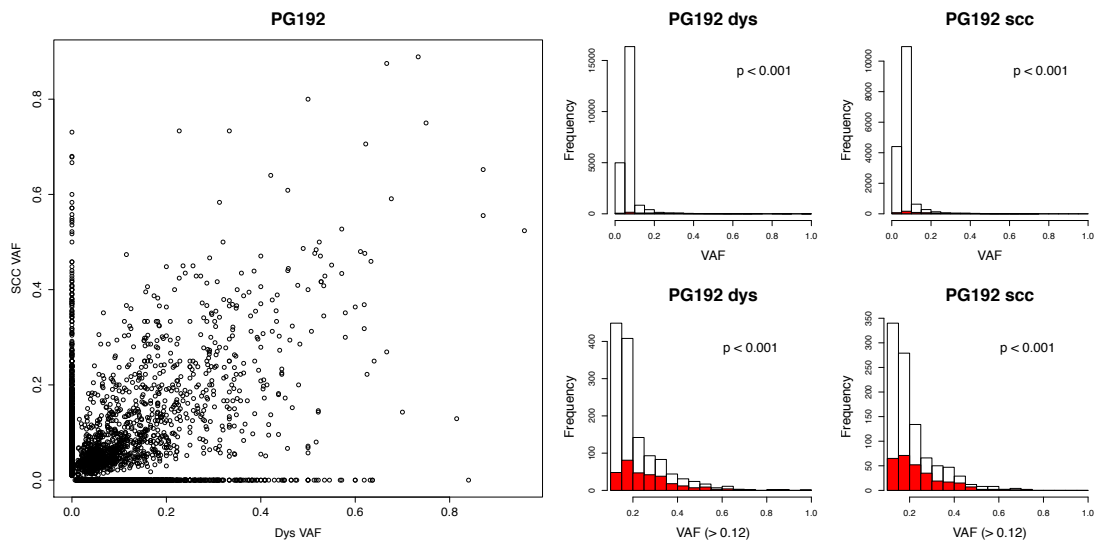

Figure S7 (following pages): Plots to test for neutral tumour evolution. For each exome sample, for all mutations with a VAF > 0.12 and < 0.24 (thereby excluding truncal mutations and spurious calls), a plot of number of cumulative mutations at a VAF versus 1/VAF is shown. An  $R^2$  goodness of fit value is shown, with values over 0.98 being indicative of neutrality.

S7a: PG004

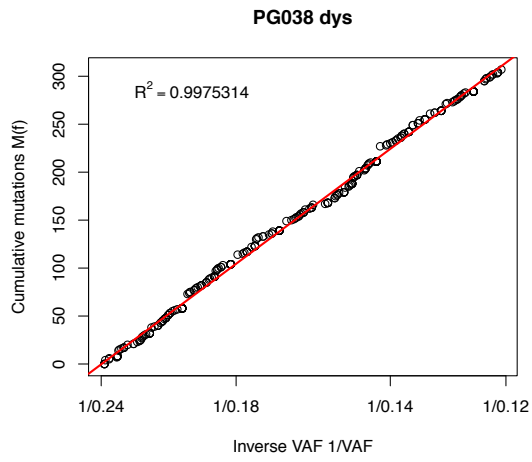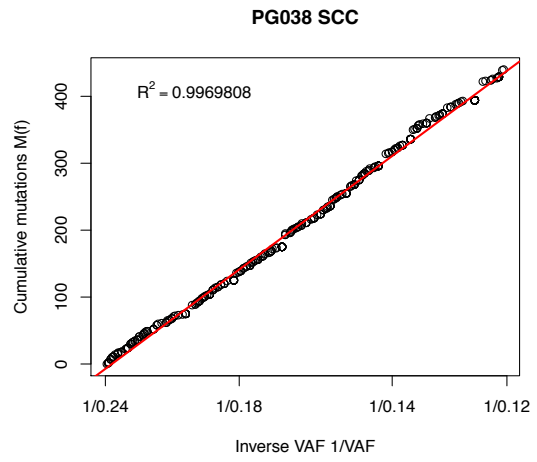

S7b: PG038

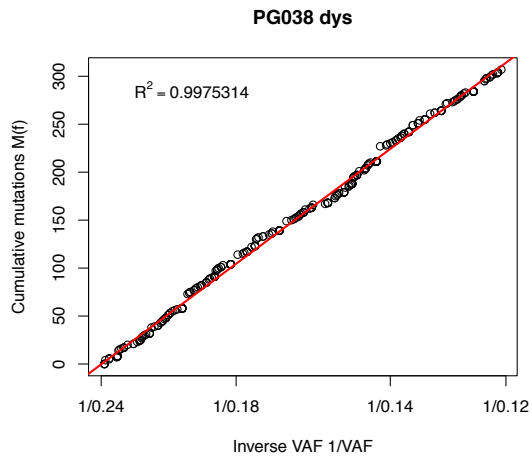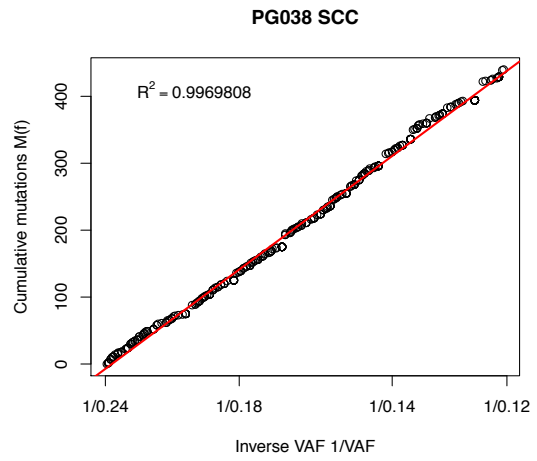

S7c: PG049

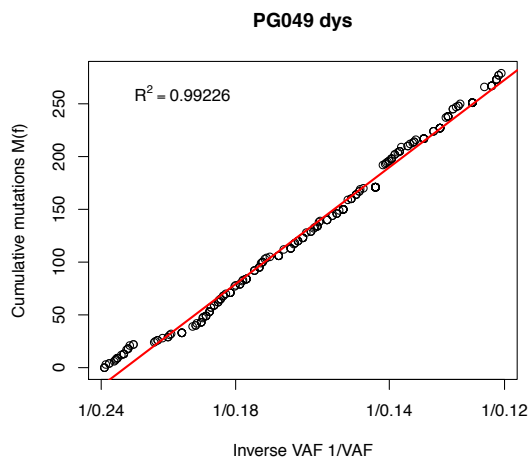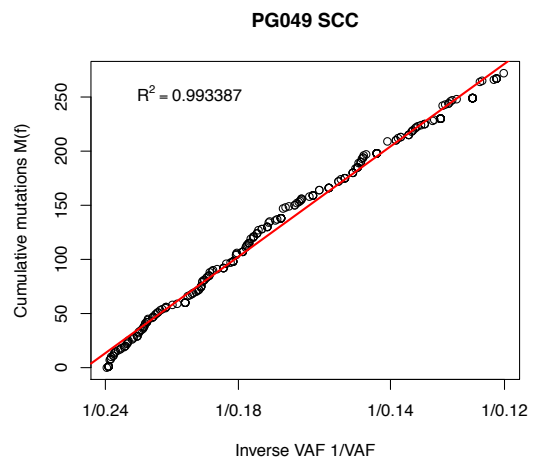



S7d: PG063

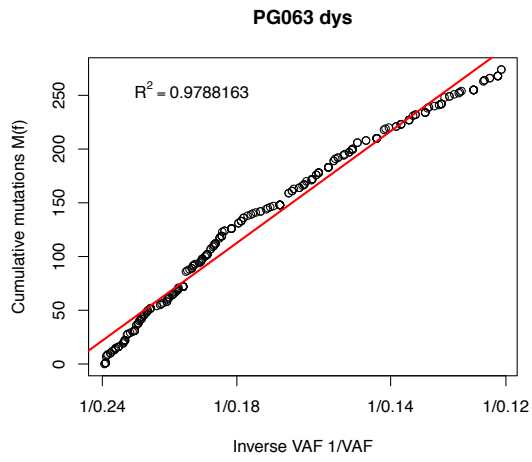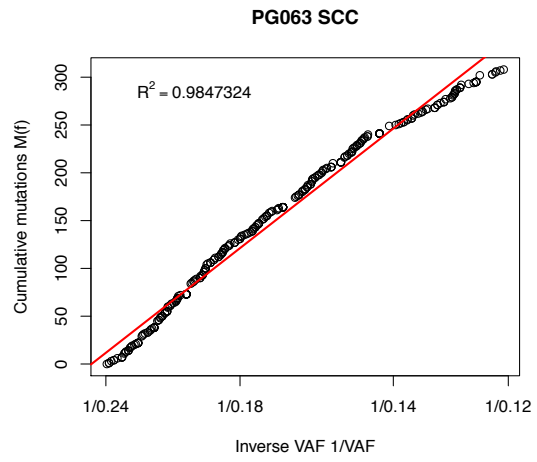

S7e: PG079

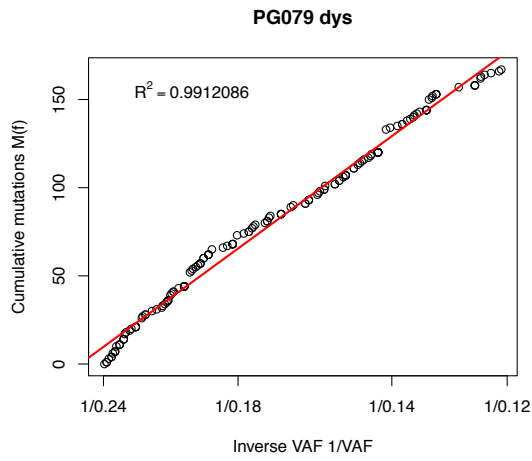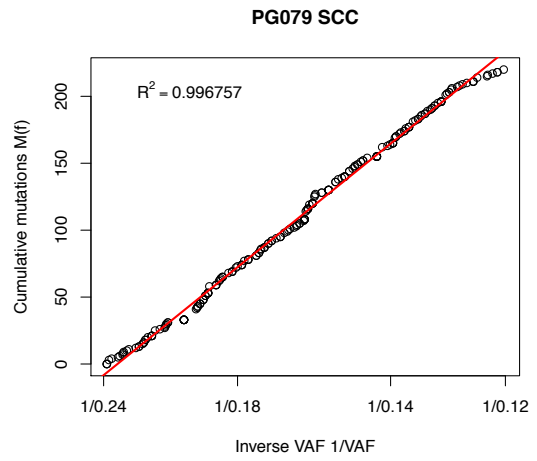

S7f: PG105

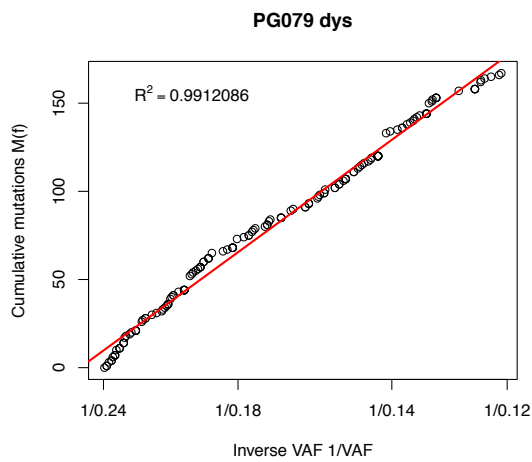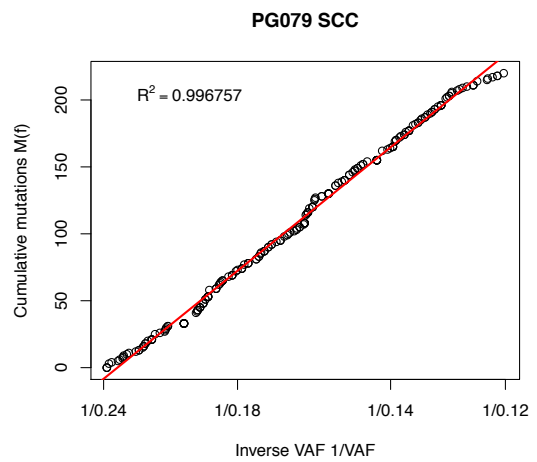

S7g: PG108

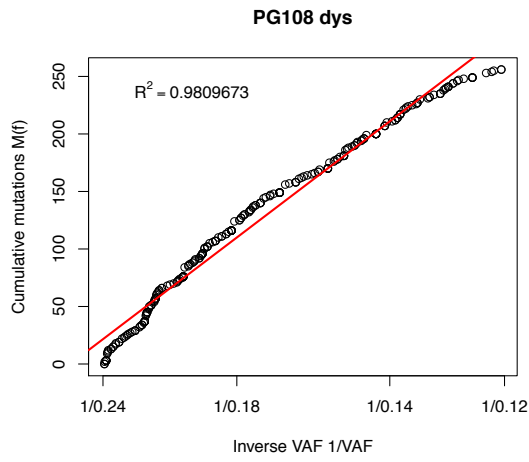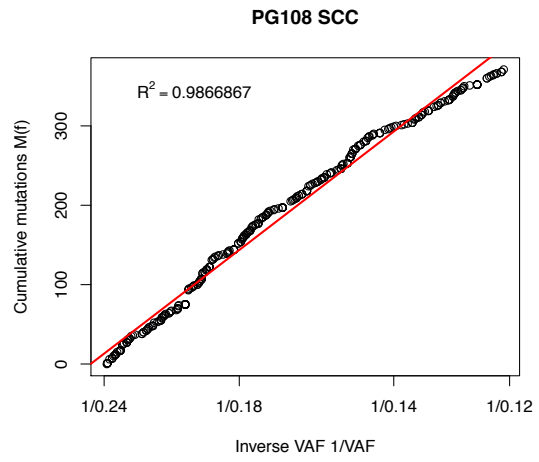

S7h: PG122

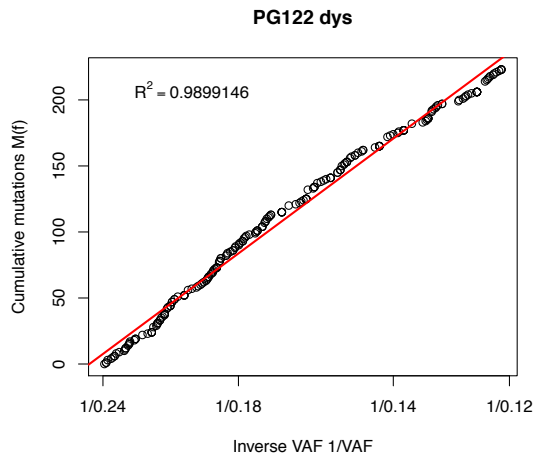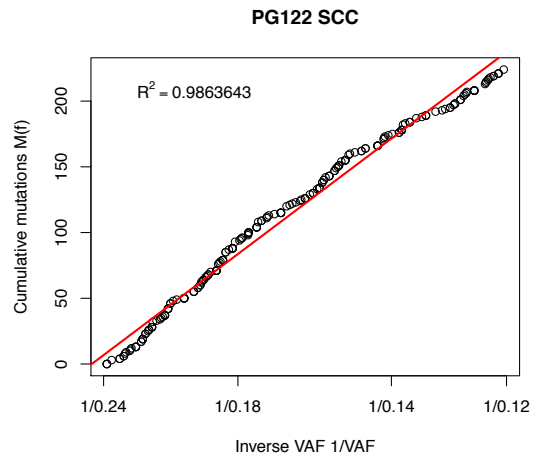

S7i: PG123

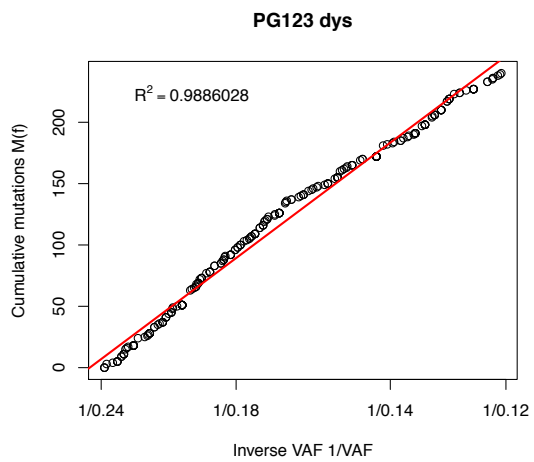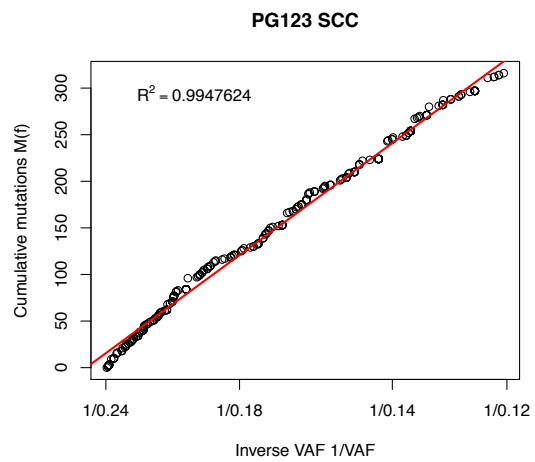

S7j: PG129

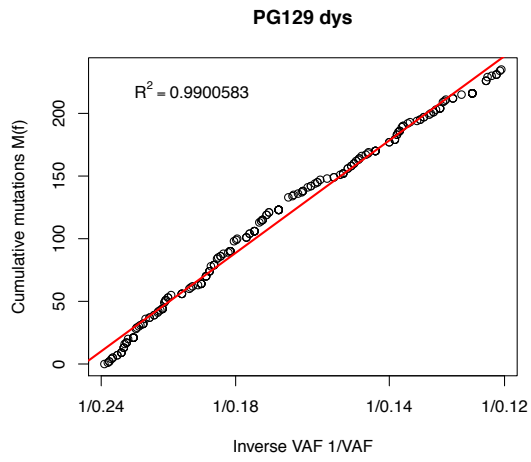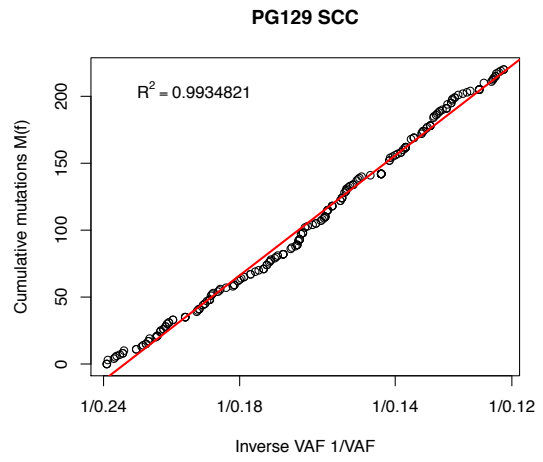

S7k: PG136

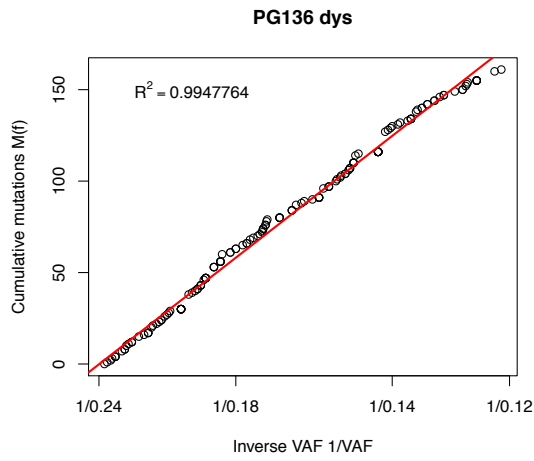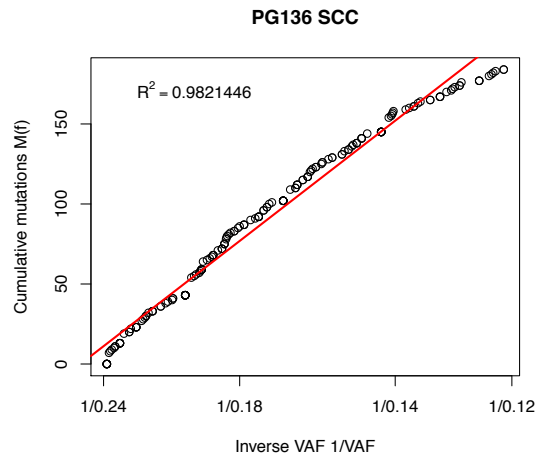

S7l: PG137

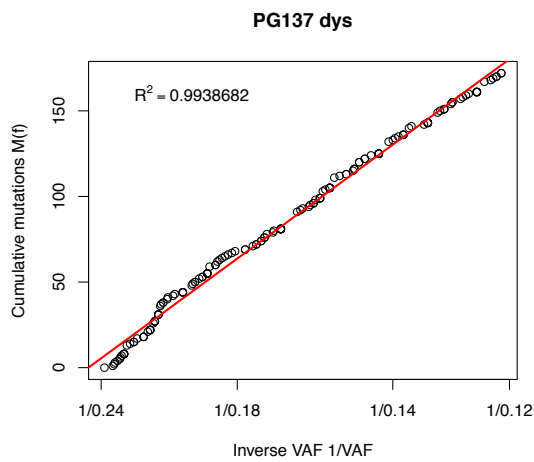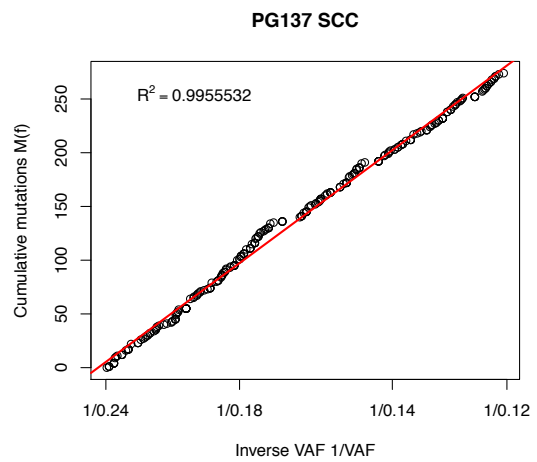

S7m: PG144

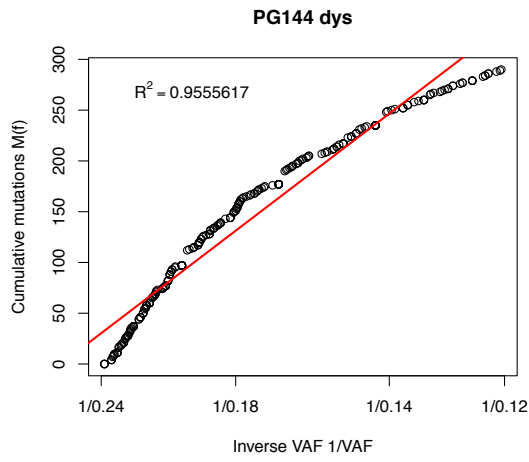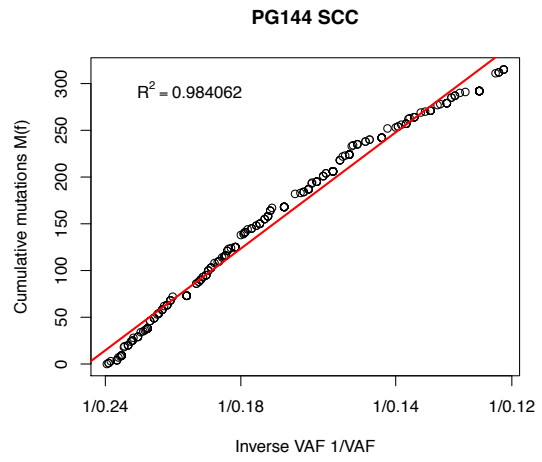

S7n: PG174

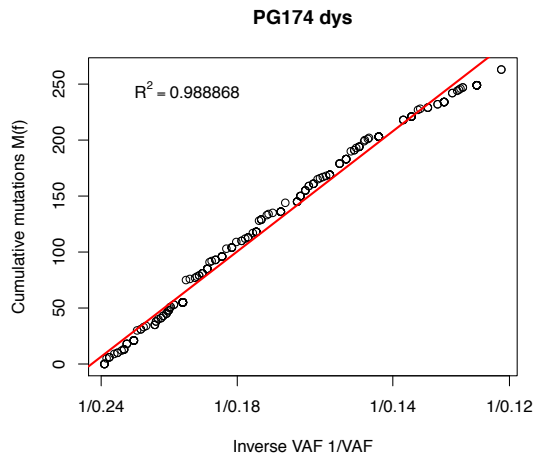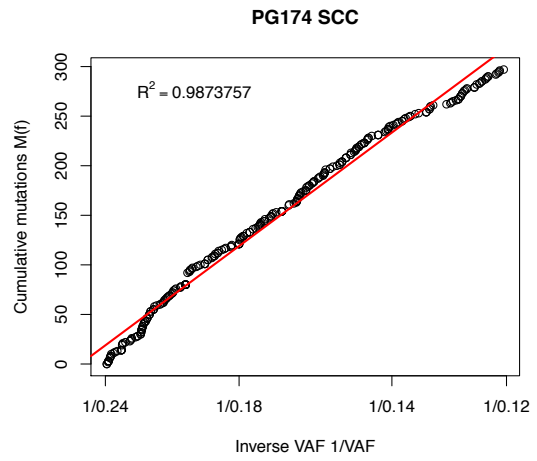

S7o: PG187

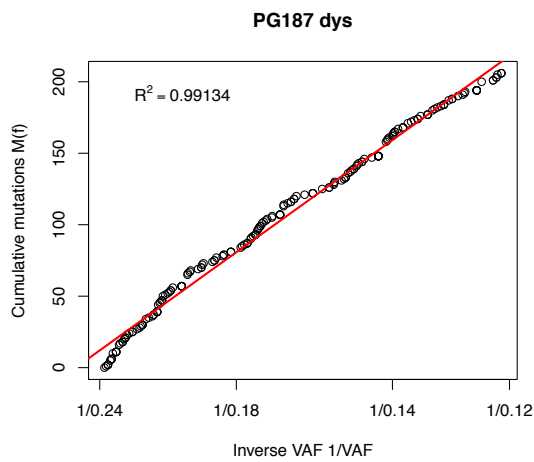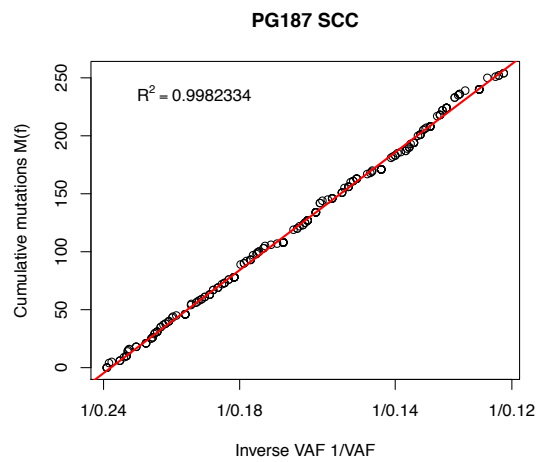

S7p: PG192

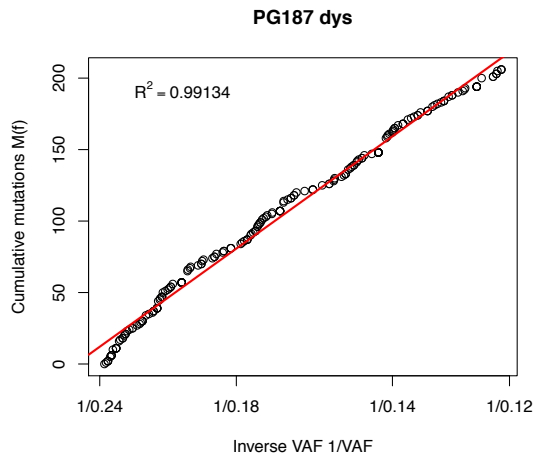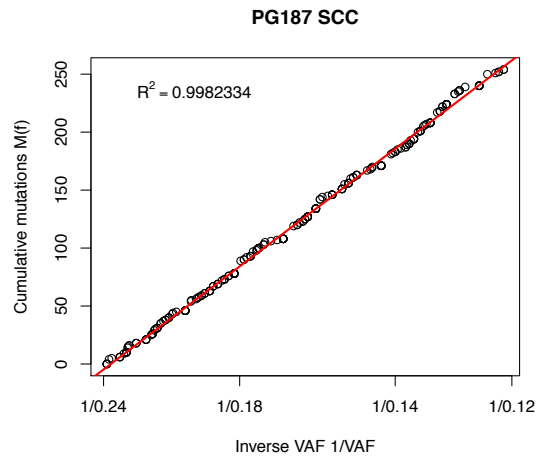

Figure S8: All filtered mutations in suspected cancer genes observed. The number to the right of each gene indicates the number of patients with a mutation in that gene. The colour of the bar indicates whether the mutation was in dysplasia, SCC or shared, and whether the SCC was adjacent to the SCC in that patient. The three leftmost patients had LGD, the remainder HGD.

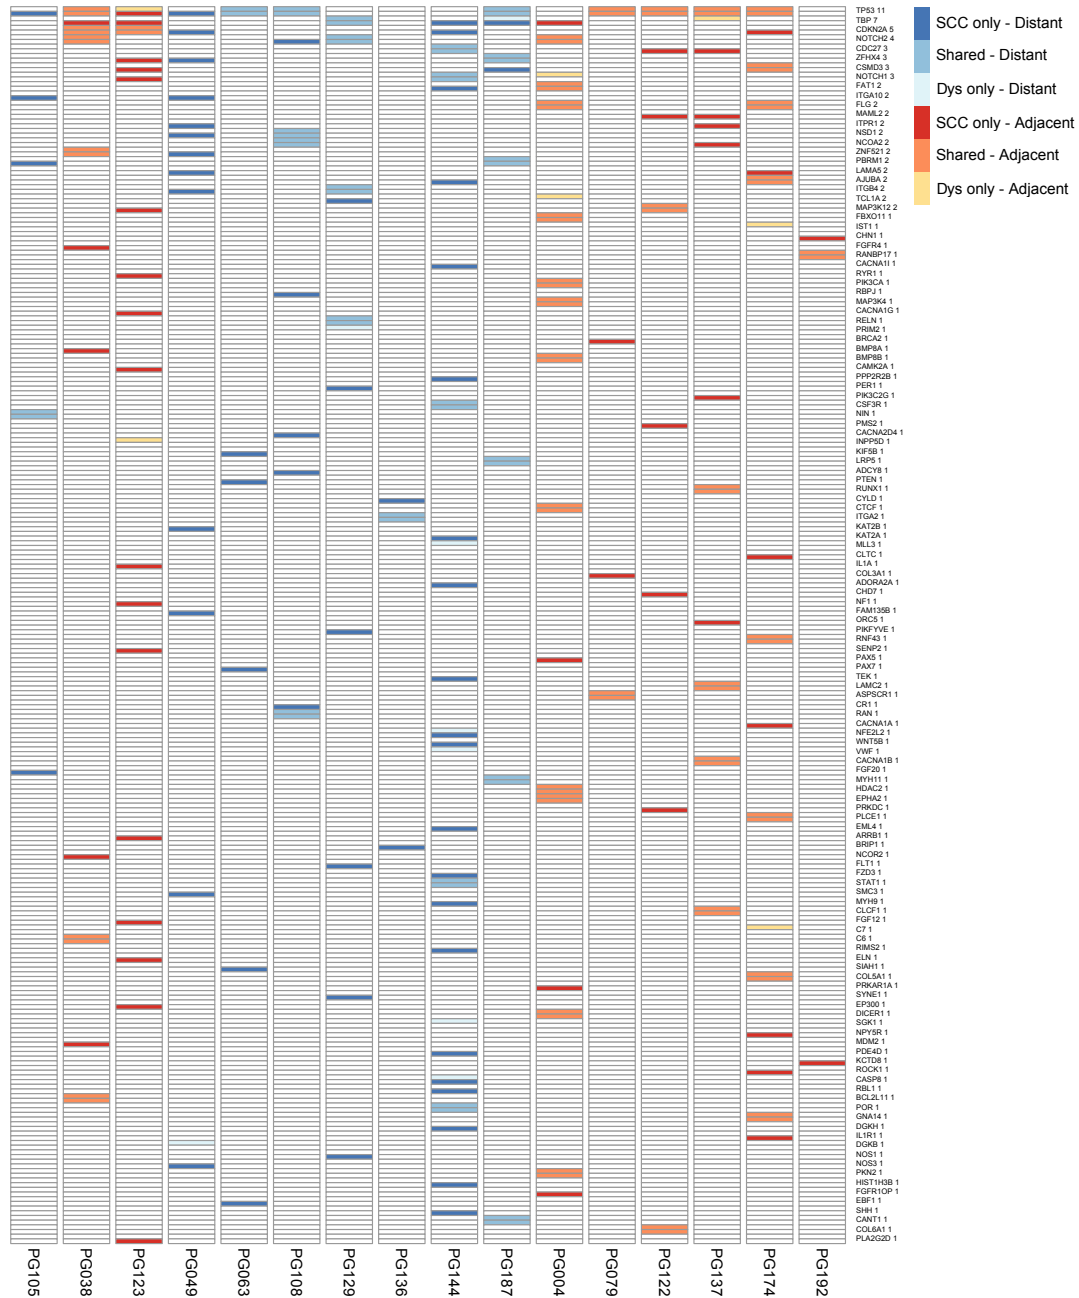

Table S3: Lists of genes mutated in 16 patients from whom exome data was obtained. Mutations were filtered by cellular frequency and effect on gene function. Mutations are classed by whether they were unique to either dysplasia or SCC sample or shared, and by whether they are in suspected cancer genes or not. If a gene is listed in more than one column for a patient, that indicates two distinct mutations in different samples.

| <b>suspected cancer genes</b> |                     |                       |
|-------------------------------|---------------------|-----------------------|
| <b>PG004 dysplasia only</b>   | <b>PG004 shared</b> | <b>PG004 SCC only</b> |
| <i>TCL1A</i>                  | <i>FBXO11</i>       | <i>TBP</i>            |
| <i>NOTCH1</i>                 | <i>HDAC2</i>        | <i>PRKAR1A</i>        |
| <i>EPHA2</i>                  | <i>DICER1</i>       | <i>PAX5</i>           |
|                               | <i>MAP3K4</i>       | <i>FGFR1OP</i>        |
|                               | <i>EPHA2</i>        |                       |
|                               | <i>FAT1</i>         |                       |
|                               | <i>CTCF</i>         |                       |
|                               | <i>PKN2</i>         |                       |
|                               | <i>PIK3CA</i>       |                       |
|                               | <i>CTCF</i>         |                       |
|                               | <i>FLG</i>          |                       |
|                               | <i>BMP8B</i>        |                       |
|                               | <i>NOTCH2</i>       |                       |

| <b>other genes/genomic features</b> |                     |                          |
|-------------------------------------|---------------------|--------------------------|
| <b>PG004 dysplasia only</b>         | <b>PG004 shared</b> | <b>PG004 SCC only</b>    |
| <i>ACACA</i>                        | <i>LGALS16</i>      | <i>ATG2B</i>             |
| <i>RP13-60M5.2.1</i>                | <i>ADRA2C</i>       | <i>CDYL2</i>             |
| <i>HNRNPCL1</i>                     | <i>AC079354.1.1</i> | <i>ITSN2</i>             |
| <i>SVEP1</i>                        | <i>LPHN2</i>        | <i>AC128677.4.1</i>      |
| <i>NOL4</i>                         | <i>TGM5</i>         | <i>FCER2</i>             |
| <i>NUDT12</i>                       | <i>PTGFRN</i>       | <i>SORCS2</i>            |
| <i>MDN1</i>                         | <i>SLC28A1</i>      | <i>PRAMEF9</i>           |
| <i>RP4-635E18.6.1</i>               | <i>DNAH10</i>       | <i>DDX11</i>             |
| <i>GABRG1</i>                       | <i>COL15A1</i>      | <i>CHID1</i>             |
| <i>ATXN1</i>                        | <i>ACIN1</i>        | <i>G2E3</i>              |
| <i>CTC-451A6.1.1</i>                | <i>GALNT13</i>      | <i>FAM20A</i>            |
| <i>SLC40A1</i>                      | <i>ANK3</i>         | <i>LRRC48</i>            |
| <i>CST3</i>                         | <i>CTDSP1</i>       | <i>ATPAF2</i>            |
| <i>OR4C3</i>                        | <i>TP53BP2</i>      | <i>NEDD9</i>             |
| <i>OR4C3</i>                        | <i>SOX9</i>         | <i>CCDC57</i>            |
| <i>TIMM44</i>                       | <i>OR8F1P</i>       | <i>NF1P6</i>             |
| <i>CASD1</i>                        | <i>UGT2A3</i>       | <i>XXyac-YX155B6.3.1</i> |
| <i>FCGBP</i>                        | <i>TGM7</i>         | <i>NBPF24</i>            |
| <i>RP11-231C14.4.1</i>              | <i>WFIKKN2</i>      | <i>SORCS3</i>            |
| <i>TRAK2</i>                        | <i>DNAH6</i>        | <i>TPRX1</i>             |

|                 |                       |                |
|-----------------|-----------------------|----------------|
| <i>NBPF20</i>   | <i>FAM35B</i>         | <i>AMBRA1</i>  |
| <i>C15orf40</i> | <i>KCNJ4</i>          | <i>ECD</i>     |
| <i>DYNC1LI2</i> | <i>RRP12</i>          | <i>SNX29P2</i> |
| <i>WNK1</i>     | <i>TMEM150C</i>       | <i>KRT16P2</i> |
| <i>AHNAK2</i>   | <i>RP11-59N23.1.1</i> | <i>TNRC18C</i> |
| <i>MYO10</i>    | <i>STX2</i>           | <i>KRT83</i>   |
| <i>NPIPL2</i>   | <i>RPL14</i>          | <i>RGS6</i>    |
|                 | <i>AC107081.5.1</i>   | <i>SEPSECS</i> |
|                 | <i>CCT4</i>           |                |
|                 | <i>EHF</i>            |                |
|                 | <i>DNAH9</i>          |                |
|                 | <i>ACTR3C</i>         |                |
|                 | <i>CECR2</i>          |                |
|                 | <i>DNMT3L</i>         |                |
|                 | <i>VPS13B</i>         |                |
|                 | <i>OVOL3</i>          |                |
|                 | <i>AFM</i>            |                |
|                 | <i>REXO1L2P</i>       |                |
|                 | <i>ATP8B1</i>         |                |
|                 | <i>ATP6V1B2</i>       |                |
|                 | <i>DLG5</i>           |                |
|                 | <i>SEMA3A</i>         |                |
|                 | <i>LRRC16B</i>        |                |
|                 | <i>UNKL</i>           |                |
|                 | <i>RADIL</i>          |                |
|                 | <i>CSMD1</i>          |                |
|                 | <i>ITGAL</i>          |                |
|                 | <i>C22orf25</i>       |                |
|                 | <i>METRNL</i>         |                |
|                 | <i>MYCBP2</i>         |                |
|                 | <i>CYP1B1</i>         |                |
|                 | <i>C9orf43</i>        |                |
|                 | <i>SIDT1</i>          |                |
|                 | <i>GGN</i>            |                |
|                 | <i>ZCWPW1</i>         |                |
|                 | <i>SNX2</i>           |                |
|                 | <i>FER</i>            |                |
|                 | <i>TNFRSF25</i>       |                |

| <b>suspected cancer genes</b> |                     |                       |
|-------------------------------|---------------------|-----------------------|
| <b>PG038 dysplasia only</b>   | <b>PG038 shared</b> | <b>PG038 SCC only</b> |
|                               | <i>BCL2L11</i>      | <i>FGFR4</i>          |
|                               | <i>CDKN2A</i>       | <i>NCOR2</i>          |
|                               | <i>C6</i>           | <i>TBP</i>            |
|                               | <i>NOTCH2</i>       | <i>MDM2</i>           |



|  |                                               |              |
|--|-----------------------------------------------|--------------|
|  | <i>NOTCH2</i><br><i>ZNF521</i><br><i>TP53</i> | <i>BMP8A</i> |
|--|-----------------------------------------------|--------------|

| <b>other genes/genomic features</b> |                     |                        |
|-------------------------------------|---------------------|------------------------|
| <b>PG038 dysplasia only</b>         | <b>PG038 shared</b> | <b>PG038 SCC only</b>  |
| <i>TPSAB1</i>                       | <i>MCTP1</i>        | <i>NARG2</i>           |
| <i>IRF2BPL</i>                      | <i>AC008103.5.1</i> | <i>SNX24</i>           |
| <i>RP3-377D14.1.1</i>               | <i>SMYD4</i>        | <i>DPYD</i>            |
| <i>FOXD4L2</i>                      | <i>MEF2A</i>        | <i>PABPC1</i>          |
| <i>RP11-534G20.3.1</i>              | <i>MERTK</i>        | <i>GCKR</i>            |
| <i>RP11-146D12.2.1</i>              | <i>EXOC1</i>        | <i>RP11-368J21.1.1</i> |
| <i>MUC4</i>                         | <i>BIRC6</i>        | <i>EIF4G3</i>          |
| <i>FAM90A1</i>                      | <i>NCAN</i>         | <i>DNAH12</i>          |
| <i>FAM22G</i>                       | <i>MUC4</i>         | <i>MFHAS1</i>          |
| <i>NBEA</i>                         | <i>APOB</i>         | <i>ZDHHC14</i>         |
|                                     | <i>ZAN</i>          | <i>F11R</i>            |
|                                     | <i>LAPTM4A</i>      | <i>PCDHGB2</i>         |
|                                     | <i>TMEM88</i>       | <i>SNAPC2</i>          |
|                                     | <i>MUC4</i>         | <i>IRF5</i>            |
|                                     | <i>GOLGA8G</i>      | <i>FAM193A</i>         |
|                                     | <i>ANKRD36C</i>     | <i>RIC8B</i>           |
|                                     | <i>ZSCAN5B</i>      | <i>PTPN4</i>           |
|                                     | <i>NRP2</i>         | <i>SEC14L5</i>         |
|                                     | <i>FUZ</i>          | <i>SLC25A29</i>        |
|                                     | <i>PRAMEF6</i>      | <i>CNOT10</i>          |
|                                     | <i>MAGEL2</i>       | <i>RALGAPB</i>         |
|                                     | <i>PCDHB18</i>      | <i>PCSK1</i>           |
|                                     | <i>SNAP25</i>       | <i>DNAH7</i>           |
|                                     | <i>RORB</i>         | <i>DNMT1</i>           |
|                                     |                     | <i>MEPCE</i>           |
|                                     |                     | <i>EGR2</i>            |
|                                     |                     | <i>TSC22D2</i>         |
|                                     |                     | <i>C14orf23</i>        |
|                                     |                     | <i>BMPR1B</i>          |
|                                     |                     | <i>SLC35B1</i>         |
|                                     |                     | <i>WDPCP</i>           |
|                                     |                     | <i>MBTPS1</i>          |
|                                     |                     | <i>TDRD12</i>          |
|                                     |                     | <i>NBPF10</i>          |
|                                     |                     | <i>TTC39C</i>          |
|                                     |                     | <i>ANKLE2</i>          |
|                                     |                     | <i>PEBP4</i>           |
|                                     |                     | <i>RP11-459E5.1.1</i>  |
|                                     |                     | <i>RP11-69E11.4.1</i>  |

|  |  |                                                                                                                                           |
|--|--|-------------------------------------------------------------------------------------------------------------------------------------------|
|  |  | <i>HTN1</i><br><i>GMEB1</i><br><i>AC100803.1.1</i><br><i>MST1</i><br><i>RP11-88I21.2.1</i><br><i>UPF3A</i><br><i>C8B</i><br><i>SPATA8</i> |
|--|--|-------------------------------------------------------------------------------------------------------------------------------------------|

| <b>suspected cancer genes</b> |                     |                                                                                                                                                                                                               |
|-------------------------------|---------------------|---------------------------------------------------------------------------------------------------------------------------------------------------------------------------------------------------------------|
| <b>PG049 dysplasia only</b>   | <b>PG049 shared</b> | <b>PG049 SCC only</b>                                                                                                                                                                                         |
| <i>DGKB</i>                   |                     | <i>ITGA10</i><br><i>ITGB4</i><br><i>ITPR1</i><br><i>NSD1</i><br><i>CDKN2A</i><br><i>NOS3</i><br><i>SMC3</i><br><i>KAT2B</i><br><i>ZFHX4</i><br><i>TP53</i><br><i>LAMA5</i><br><i>ZNF521</i><br><i>FAM135B</i> |

| <b>other genes/genomic features</b>                                                |                                              |                                                                                                                                                                                                                                                                                                       |
|------------------------------------------------------------------------------------|----------------------------------------------|-------------------------------------------------------------------------------------------------------------------------------------------------------------------------------------------------------------------------------------------------------------------------------------------------------|
| <b>PG049 dysplasia only</b>                                                        | <b>PG049 shared</b>                          | <b>PG049 SCC only</b>                                                                                                                                                                                                                                                                                 |
| <i>MED31</i><br><i>NBEA</i><br><i>NEFH</i><br><i>ANKLE1</i><br><i>AC004967.7.1</i> | <i>ATP8A1</i><br><i>MDC1</i><br><i>LMAN1</i> | <i>CCDC33</i><br><i>CTNS</i><br><i>KCNQ3</i><br><i>C6orf132</i><br><i>DYNC111</i><br><i>PTPRQ</i><br><i>SSH1</i><br><i>CNTLN</i><br><i>RHOT2</i><br><i>GALK1</i><br><i>IL27RA</i><br><i>COL13A1</i><br><i>DTNB</i><br><i>GALNT13</i><br><i>CATSPER1</i><br><i>WIPF1</i><br><i>EYA4</i><br><i>UBR3</i> |

TRGC2  
CFHR4  
AP1G2  
RP11-66N24.3.1  
USP6NL  
HIST1H4F  
GRID2  
SOD2  
WTAP  
USF1  
FAM75A7  
ATP13A5  
TNRC6B  
MPP2  
TRDN  
NARS  
GRHPR  
PHYH  
IGHV4-34  
SPG11  
FGD6  
SOD2  
PENK  
NAT8  
RWDD2B  
STXBP4  
C2orf71  
TRAP1  
OR2A4  
DYNC111  
ARMC9  
SARDH  
HERC2  
PRPF4B  
RFPL4A  
C6orf103  
GFRA1  
BTBD8  
BRD7  
CCDC80  
PRUNE2  
SLC12A9  
TMEM178  
SLC24A6  
IL27RA  
DDX60L

|  |  |                                                                                                                                                                                                                                                                                          |
|--|--|------------------------------------------------------------------------------------------------------------------------------------------------------------------------------------------------------------------------------------------------------------------------------------------|
|  |  | <p>GMEB2<br/> TXNDC16<br/> KPNA2<br/> CENPM<br/> SNAP91<br/> TRPC4<br/> SUSD1<br/> PSG4<br/> CAMKMT<br/> PCSK5<br/> TBC1D3G<br/> CDH24<br/> RNF213<br/> AKAP6<br/> RP11-1220K2.2.1<br/> MTFR1<br/> TCF25<br/> FSTL5<br/> GULP1<br/> ASNS<br/> PRKD3<br/> DMRTA2<br/> SACS<br/> FOLR4</p> |
|--|--|------------------------------------------------------------------------------------------------------------------------------------------------------------------------------------------------------------------------------------------------------------------------------------------|

| suspected cancer genes |              |                                                       |
|------------------------|--------------|-------------------------------------------------------|
| PG063 dysplasia only   | PG063 shared | PG063 SCC only                                        |
|                        | TP53         | <p>KIF5B<br/> PTEN<br/> SIAH1<br/> PAX7<br/> EBF1</p> |

| other genes/genomic features |                 |                |
|------------------------------|-----------------|----------------|
| PG063 dysplasia only         | PG063 shared    | PG063 SCC only |
| FOXD4L2                      | MPND            | POTEF          |
| COL12A1                      | SLC10A2         | CERS3          |
| OR7G1                        | LZTR1           | PZP            |
| ZNF812                       | OR9I1           | MUC4           |
| PNPLA8                       | CWC15           | HELZ           |
| CNBD1                        | PNPLA7          | BTG4           |
| HNRNPC                       | DSPP            | NECAB3         |
| PRR14                        | RP11-742B18.1.1 | DPF2           |
| CASD1                        | TCP10L2         | PSD            |
| PUM1                         | ALMS1           | RP1-170O19.2.1 |

|  |                        |                        |
|--|------------------------|------------------------|
|  | <i>MIER2</i>           | <i>CLMP</i>            |
|  | <i>PARP4P2</i>         | <i>PLEKHH3</i>         |
|  | <i>RP11-382J12.1.1</i> | <i>SDHAP1</i>          |
|  | <i>SRSF4</i>           | <i>FAM71E2</i>         |
|  | <i>RBM39</i>           | <i>AC004019.10.1</i>   |
|  | <i>AC016773.1</i>      | <i>CECR2</i>           |
|  | <i>TACC3</i>           | <i>NEFH</i>            |
|  | <i>UNC45A</i>          | <i>AL031590.1</i>      |
|  | <i>MYH8</i>            | <i>RRN3P1</i>          |
|  | <i>RPL6P12</i>         | <i>SLC10A6</i>         |
|  | <i>SH3RF1</i>          | <i>ACACA</i>           |
|  | <i>ZNF644</i>          | <i>MESP2</i>           |
|  | <i>FAM86C1</i>         | <i>KRT37</i>           |
|  |                        | <i>FNDC3A</i>          |
|  |                        | <i>IQSEC3</i>          |
|  |                        | <i>TGIF2</i>           |
|  |                        | <i>ZNF737</i>          |
|  |                        | <i>AMPH</i>            |
|  |                        | <i>C1D</i>             |
|  |                        | <i>GOLGA8H</i>         |
|  |                        | <i>CD58</i>            |
|  |                        | <i>SAFB2</i>           |
|  |                        | <i>STARD9</i>          |
|  |                        | <i>USP33</i>           |
|  |                        | <i>RP11-1220K2.2.1</i> |
|  |                        | <i>SNHG5</i>           |
|  |                        | <i>PRKAG1</i>          |
|  |                        | <i>RP11-386G11.5.1</i> |
|  |                        | <i>TRPV4</i>           |
|  |                        | <i>EPHX4</i>           |
|  |                        | <i>LITAF</i>           |

| <b>suspected cancer genes</b> |                     |                       |
|-------------------------------|---------------------|-----------------------|
| <b>PG079 dysplasia only</b>   | <b>PG079 shared</b> | <b>PG079 SCC only</b> |
|                               | <i>ASPSCR1</i>      | <i>COL3A1</i>         |
|                               | <i>TP53</i>         | <i>BRCA2</i>          |

| <b>other genes/genomic features</b> |                       |                       |
|-------------------------------------|-----------------------|-----------------------|
| <b>PG079 dysplasia only</b>         | <b>PG079 shared</b>   | <b>PG079 SCC only</b> |
| <i>PRAMEF15</i>                     | <i>RGS6</i>           | <i>MPND</i>           |
| <i>RP11-144A16.1.1</i>              | <i>ARL4A</i>          | <i>ARHGEF40</i>       |
| <i>SLC25A28</i>                     | <i>MUC12</i>          | <i>PCGF6</i>          |
|                                     | <i>GUCY2C</i>         | <i>PPP1R13B</i>       |
|                                     | <i>RP11-174G6.1.1</i> | <i>PABPC1</i>         |
|                                     | <i>PDE9A</i>          | <i>KIRREL2</i>        |

|  |                |                  |
|--|----------------|------------------|
|  | AC006465.3.1   | NPHS1            |
|  | PCDH8P1        | KRTAP5-5         |
|  | PPP1R16B       | GLG1             |
|  | FAM22F         | UIMC1            |
|  | RP11-356C4.2.1 | PABPC1           |
|  | IRX6           | HUNK             |
|  | NCOA3          | RP11-1348G14.2.1 |
|  | ZNF799         | NBPF12           |
|  | PRAMEF13       | TBC1D3G          |
|  | UPF3A          | DOCK8            |
|  |                | EFCAB5           |
|  |                | GALNT7           |
|  |                | CAPN12           |
|  |                | POLR3H           |
|  |                | ABCA2            |
|  |                | HNRNPC           |
|  |                | TACC3            |
|  |                | AC016773.1       |
|  |                | PPFIA2           |
|  |                | OFCC1            |
|  |                | RCN3             |
|  |                | NBPF12           |

| suspected cancer genes |              |                |
|------------------------|--------------|----------------|
| PG105 dysplasia only   | PG105 shared | PG105 SCC only |
|                        | NIN          | ITGA10         |
|                        |              | PBRM1          |
|                        |              | FGF20          |
|                        |              | TP53           |

| other genes/genomic features |                 |                |
|------------------------------|-----------------|----------------|
| PG105 dysplasia only         | PG105 shared    | PG105 SCC only |
| MTMR11                       | EPS8            | EPHA10         |
| KARS                         | AC093818.1.1    | MAST1          |
| AC026150.9.1                 | TUBA3E          | NHLRC3         |
| POM121C                      | RNF17           | RBMXL1         |
| CCDC69                       | PRAMEF6         | IFT43          |
| ZSWIM6                       | DDA1            | RGS6           |
| PANK3                        | RP11-286O18.1.1 | HDC            |
| PROSER1                      |                 | TPRXL          |
| AMY2A                        |                 | CCT5           |
| GOLGA6L2                     |                 | KIAA1107       |
| AC026150.9.1                 |                 | GFPT2          |
| FAM90A1                      |                 | BX004987.5.1   |
|                              |                 | TRIM49L2       |

|  |  |                                                                                     |
|--|--|-------------------------------------------------------------------------------------|
|  |  | ANO1<br>MYCBP2<br>C19orf44<br>CALR3<br>XXbac-<br>BPG55C20.1.1<br>SLC45A4<br>GDAP1L1 |
|--|--|-------------------------------------------------------------------------------------|

| <b>suspected cancer genes</b> |                                                          |                                                                               |
|-------------------------------|----------------------------------------------------------|-------------------------------------------------------------------------------|
| <b>PG108 dysplasia only</b>   | <b>PG108 shared</b>                                      | <b>PG108 SCC only</b>                                                         |
|                               | <i>NSD1</i><br><i>RAN</i><br><i>NCOA2</i><br><i>TP53</i> | <i>RBPJ</i><br><i>CR1</i><br><i>CACNA2D4</i><br><i>ADCY8</i><br><i>NOTCH2</i> |

| <b>other genes/genomic features</b> |                       |                       |
|-------------------------------------|-----------------------|-----------------------|
| <b>PG108 dysplasia only</b>         | <b>PG108 shared</b>   | <b>PG108 SCC only</b> |
| <i>OVGP1</i>                        | <i>OR6M1</i>          | <i>ROBO2</i>          |
| <i>TMEM200B</i>                     | <i>SERINC2</i>        | <i>RP11-88K11.1.1</i> |
| <i>CDK13</i>                        | <i>CDH8</i>           | <i>RP11-257K9.6.1</i> |
| <i>NOD1</i>                         | <i>ZNF48</i>          | <i>FAM182A</i>        |
| <i>TASP1</i>                        | <i>SIPA1L1</i>        | <i>PREX2</i>          |
| <i>TMEM200C</i>                     | <i>FAM194B</i>        | <i>AC069513.3.1</i>   |
| <i>GLIS3</i>                        | <i>SPAG17</i>         | <i>SDHAP2</i>         |
| <i>ABI3BP</i>                       | <i>LCT</i>            | <i>VPS41</i>          |
| <i>RP11-1000B6.4.1</i>              | <i>INTS6</i>          | <i>SEC16B.1</i>       |
| <i>CTAGE8</i>                       | <i>TRPM5</i>          | <i>KIAA0664</i>       |
| <i>KRTAP4-5</i>                     | <i>MCF2L</i>          | <i>ABCB10P1</i>       |
| <i>TECPR1</i>                       | <i>IQCK</i>           | <i>BDP1</i>           |
| <i>NBPF16</i>                       | <i>TRAPPC6A</i>       | <i>TBC1D21</i>        |
| <i>RP11-1000B6.4.1</i>              | <i>PPP1R12A</i>       | <i>C16orf62</i>       |
| <i>FAM75A7</i>                      | <i>SPECC1L</i>        | <i>ANO1</i>           |
| <i>RP11-1000B6.4.1</i>              | <i>KB-1896H10.1.1</i> | <i>ATG9A</i>          |
| <i>ARFIP2</i>                       | <i>EHMT1</i>          | <i>SPAG17</i>         |
|                                     | <i>PRR19</i>          | <i>CDC42EP1</i>       |
|                                     | <i>GRB14</i>          | <i>IL17RA</i>         |
|                                     | <i>PIWIL4</i>         | <i>DGCR14</i>         |
|                                     | <i>COPZ2</i>          | <i>SLC45A4</i>        |
|                                     | <i>QTRT1</i>          | <i>FAM86B1</i>        |
|                                     | <i>ACOT11</i>         | <i>PPAT</i>           |
|                                     | <i>MPRIP</i>          | <i>ZNF653</i>         |
|                                     | <i>MAP1A</i>          | <i>SYCP2</i>          |
|                                     | <i>METTL7A</i>        | <i>KRTAP5-11</i>      |

|  |           |            |
|--|-----------|------------|
|  | CALCOCO1  | OR7E87P    |
|  | SLC30A5   | AP000867.1 |
|  | SCPEP1    | CROCCP2    |
|  | MARCH1    | C8orf80    |
|  | KRTAP13-4 | PAX1       |
|  | CRISP1    | POLR1C     |
|  | ESYT2     | HAGH       |
|  | PRSS38    | TGFB111    |
|  | ZBTB41    | LCOR       |
|  | MUC4      | SEC14L5    |
|  | LRRC43    | CSMD1      |
|  | ANXA13    | ACTR8      |
|  | PLAGL1    | RGS6       |
|  |           | AXDND1     |
|  |           | RASEF      |

| <b>suspected cancer genes</b> |                     |                       |
|-------------------------------|---------------------|-----------------------|
| <b>PG122 dysplasia only</b>   | <b>PG122 shared</b> | <b>PG122 SCC only</b> |
|                               | COL6A1              | PMS2                  |
|                               | MAP3K12             | MAML2                 |
|                               | TP53                | CHD7                  |
|                               |                     | PRKDC                 |
|                               |                     | CDC27                 |

| <b>other genes/genomic features</b> |                     |                       |
|-------------------------------------|---------------------|-----------------------|
| <b>PG122 dysplasia only</b>         | <b>PG122 shared</b> | <b>PG122 SCC only</b> |
| RP11-613M5.2.1                      | DENND1A             | PGM2L1                |
| ZNF98                               | ZNF879              | ADCK2                 |
| SDCCAG8                             | MIDN                | RP4-726N20.2.1        |
| RP11-47A17.2.1                      | C21orf56            | NDUFB2                |
| MUC4                                | GPR98               | NR6A1                 |
| RP13-395E19.1.1                     | SLC26A1             | WDR41                 |
| MUC4                                | UTP11L              | IRF2BPL               |
| RP5-977B1.11.1                      | AGTPBP1             | FAF1                  |
| ACAD10                              | CERS3               | NARG2                 |
|                                     | EYS                 | SPDYE6                |
|                                     | IL16                | SUSD2                 |
|                                     | TMCO4               | ZFPM1                 |
|                                     | FAM195B             | RP11-21B21.4.1        |
|                                     | TNIK                | TMEM145               |
|                                     | BEST2               | SLCO4A1               |
|                                     | TTBK1               | DSPP                  |
|                                     | GRID2IP             | RP11-742B18.1.1       |
|                                     | AC100803.1.1        | DNAJB11               |
|                                     | ABCA2               | KCTD1                 |



|  |                       |                         |
|--|-----------------------|-------------------------|
|  | <i>CPSF1</i>          | <i>CCDC62</i>           |
|  | <i>FAM13A</i>         | <i>DZANK1</i>           |
|  | <i>DNAH5</i>          | <i>MRVI1</i>            |
|  | <i>SPIRE2</i>         | <i>RP11-460N11.1.1</i>  |
|  | <i>LPHN3</i>          | <i>SIRT2</i>            |
|  | <i>UGT2B28</i>        | <i>ZFP91</i>            |
|  | <i>C2orf18</i>        | <i>ZFP91-CNTF</i>       |
|  | <i>RP11-88I21.2.1</i> | <i>RP11-536C10.13.1</i> |
|  | <i>FHOD1</i>          | <i>SORCS2</i>           |
|  | <i>PAPPA</i>          | <i>RP11-114H24.4.1</i>  |
|  | <i>ASGR2</i>          |                         |

| <b>suspected cancer genes</b> |                     |                                                                                                                                                                                                                                                                                             |
|-------------------------------|---------------------|---------------------------------------------------------------------------------------------------------------------------------------------------------------------------------------------------------------------------------------------------------------------------------------------|
| <b>PG123 dysplasia only</b>   | <b>PG123 shared</b> | <b>PG123 SCC only</b>                                                                                                                                                                                                                                                                       |
| <i>INPP5D</i><br><i>TP53</i>  | <i>CDKN2A</i>       | <i>CACNA1G</i><br><i>CSMD3</i><br><i>RYR1</i><br><i>ZFHX4</i><br><i>ELN</i><br><i>NOTCH1</i><br><i>MAP3K12</i><br><i>TP53</i><br><i>FGF12</i><br><i>PLA2G2D</i><br><i>ZFHX4</i><br><i>EP300</i><br><i>NF1</i><br><i>TBP</i><br><i>ARRB1</i><br><i>IL1A</i><br><i>SENP2</i><br><i>CAMK2A</i> |

| <b>other genes/genomic features</b>           |                                                                                                                                                                 |                                                                                                                                                                        |
|-----------------------------------------------|-----------------------------------------------------------------------------------------------------------------------------------------------------------------|------------------------------------------------------------------------------------------------------------------------------------------------------------------------|
| <b>PG123 dysplasia only</b>                   | <b>PG123 shared</b>                                                                                                                                             | <b>PG123 SCC only</b>                                                                                                                                                  |
| <i>DNMT3L</i><br><i>ANKIB1</i><br><i>IRF2</i> | <i>APBB1IP</i><br><i>DUOX1</i><br><i>NCOA5</i><br><i>GCGR</i><br><i>ATP1B3</i><br><i>ABCA8</i><br><i>NHLRC3</i><br><i>SGSM1</i><br><i>GGT7</i><br><i>ZNF516</i> | <i>DOCK9</i><br><i>LRIT3</i><br><i>CTNND1</i><br><i>RP11-492D6.3.1</i><br><i>ZCRB1</i><br><i>NBPF24</i><br><i>CECR1</i><br><i>CLK3</i><br><i>CNOT1</i><br><i>EIF3L</i> |

CCDC57  
MYH13  
CNOT1

C10orf12  
EIF3L  
GGA3  
BTN1A1  
XIRP2  
AL583842.6.1  
DNAH11  
KIAA1429  
ATP10B  
NBPF24  
OR4Q2  
SLC26A3  
SLC43A2  
SF3B2  
KLHL14  
CCDC58  
CLDN23  
SHANK2  
COPS3  
IGSF22  
HAMP  
SFSWAP  
CTB-111H14.1.1  
ZNF804A  
BPIFB4  
RGS22  
MCM9  
NEFH  
EPN1  
APOBEC3G  
RPL27A  
PPIAL4D  
PCDHA9  
TMTC1  
SMARCD2  
ABCC3  
ATP2C2  
HS6ST1  
AP4B1  
RP5-1073O3.5.1  
SAP130  
SLC22A9  
RASEF  
HMOX2  
RAD23B  
SORCS1

|  |  |                                                                                                                                                                                                                                                                                                                                                                                                                                          |
|--|--|------------------------------------------------------------------------------------------------------------------------------------------------------------------------------------------------------------------------------------------------------------------------------------------------------------------------------------------------------------------------------------------------------------------------------------------|
|  |  | <i>PLXNB2</i><br><i>UGGT2</i><br><i>PVRL2</i><br><i>PRKCD</i><br><i>DLG1</i><br><i>OXR1</i><br><i>NBPF24</i><br><i>FOXA2</i><br><i>CCDC63</i><br><i>JPH4</i><br><i>SQLE</i><br><i>AL583842.6.1</i><br><i>HOXC12</i><br><i>PTAR1</i><br><i>POPDC2</i><br><i>PTPMT1</i><br><i>FARP1</i><br><i>PTPRM</i><br><i>BCAS3</i><br><i>C9orf102</i><br><i>SPRYD5</i><br><i>KAZN</i><br><i>ASGR2</i><br><i>TCEB3</i><br><i>HECTD1</i><br><i>DAG1</i> |
|--|--|------------------------------------------------------------------------------------------------------------------------------------------------------------------------------------------------------------------------------------------------------------------------------------------------------------------------------------------------------------------------------------------------------------------------------------------|

| <b>suspected cancer genes</b> |                                                            |                                                                                             |
|-------------------------------|------------------------------------------------------------|---------------------------------------------------------------------------------------------|
| <b>PG129 dysplasia only</b>   | <b>PG129 shared</b>                                        | <b>PG129 SCC only</b>                                                                       |
| <i>PRIM2</i>                  | <i>ITGB4</i><br><i>NOTCH2</i><br><i>TBP</i><br><i>RELN</i> | <i>PIKFYVE</i><br><i>TCL1A</i><br><i>NOS1</i><br><i>PER1</i><br><i>FLT1</i><br><i>SYNE1</i> |

| <b>other genes/genomic features</b>                                                                                    |                                                                                                                                   |                                                                                                                            |
|------------------------------------------------------------------------------------------------------------------------|-----------------------------------------------------------------------------------------------------------------------------------|----------------------------------------------------------------------------------------------------------------------------|
| <b>PG129 dysplasia only</b>                                                                                            | <b>PG129 shared</b>                                                                                                               | <b>PG129 SCC only</b>                                                                                                      |
| <i>PCGF6</i><br><i>FOXE1</i><br><i>TRIM5</i><br><i>RP11-588H23.3.1</i><br><i>TPRXL</i><br><i>SALL1</i><br><i>KCNN3</i> | <i>PPM1L</i><br><i>DDX19B</i><br><i>RP11-529K1.2.1</i><br><i>RP11-529K1.3.1</i><br><i>PLK5</i><br><i>MYLK-AS1</i><br><i>FKBP3</i> | <i>XIRP1</i><br><i>PCSK1</i><br><i>CTD-2337A12.1.1</i><br><i>SORCS2</i><br><i>TBC1D3G</i><br><i>SRCRB4D</i><br><i>NOL8</i> |

|            |                        |                        |
|------------|------------------------|------------------------|
| <i>HRG</i> | <i>RP11-380D23.1.1</i> | <i>RP11-164H13.1.1</i> |
|            | <i>ENPEP</i>           | <i>LGR4</i>            |
|            | <i>GOLGA8B</i>         | <i>SLC25A16</i>        |
|            | <i>GOLGA8A</i>         | <i>SLC45A2</i>         |
|            | <i>KDM6B</i>           | <i>SMCHD1</i>          |
|            | <i>GALK1</i>           | <i>AC008735.15.1</i>   |
|            | <i>RP11-551L14.1.1</i> | <i>CNTN3</i>           |
|            | <i>ROBO2</i>           | <i>NBPF11</i>          |
|            | <i>AMPH</i>            | <i>RAB3IP</i>          |
|            | <i>BSC12</i>           | <i>AP005901.1.1</i>    |
|            | <i>RP11-831H9.16.1</i> | <i>WDR11</i>           |
|            | <i>IGSF5</i>           | <i>PNPLA8</i>          |
|            | <i>B4GALT3</i>         | <i>DBT</i>             |
|            | <i>PPOX</i>            | <i>TSNAXIP1</i>        |
|            | <i>DNAH12</i>          | <i>DPP4</i>            |
|            | <i>KCNA7</i>           | <i>AC058791.2.1</i>    |
|            | <i>LILRB3</i>          | <i>RPAP3</i>           |
|            | <i>LILRA6</i>          | <i>LGALS9B</i>         |
|            | <i>RPS9</i>            | <i>RP11-413E6.5.1</i>  |
|            | <i>KLHL6</i>           | <i>STK38L</i>          |
|            | <i>AEBP1</i>           | <i>STK38L</i>          |
|            | <i>LRRC7</i>           | <i>NBPF24</i>          |
|            | <i>AC008103.5.1</i>    | <i>BOD1L</i>           |
|            | <i>BCRP7</i>           | <i>TIPARP</i>          |
|            |                        | <i>CDK14</i>           |
|            |                        | <i>RP5-862P8.2.1</i>   |
|            |                        | <i>RP11-707M1.1.1</i>  |
|            |                        | <i>TEPP</i>            |
|            |                        | <i>TRIM24</i>          |
|            |                        | <i>NMNAT2</i>          |

| <b>suspected cancer genes</b> |                     |                             |
|-------------------------------|---------------------|-----------------------------|
| <b>PG136 dysplasia only</b>   | <b>PG136 shared</b> | <b>PG136 SCC only</b>       |
|                               | <i>ITGA2</i>        | <i>BRIP1</i><br><i>CYLD</i> |

| <b>other genes/genomic features</b> |                        |                       |
|-------------------------------------|------------------------|-----------------------|
| <b>PG136 dysplasia only</b>         | <b>PG136 shared</b>    | <b>PG136 SCC only</b> |
| <i>KRTAP10-2</i>                    | <i>SCAF8</i>           | <i>CCT8L1P</i>        |
| <i>PRSS37</i>                       | <i>LRP1</i>            | <i>EIF4G3</i>         |
| <i>GLYATL1</i>                      | <i>RP11-405A12.2.1</i> | <i>BNIP2</i>          |
| <i>RPL7P41</i>                      | <i>GSTO1</i>           | <i>SMURF1</i>         |
| <i>TMPRSS13</i>                     | <i>TNFRSF11A</i>       | <i>PCNX</i>           |
| <i>UBXN11</i>                       | <i>CHAF1B</i>          | <i>ADAP1</i>          |
| <i>POTEB</i>                        | <i>ST6GALNAC3</i>      | <i>COX19</i>          |

|                |                        |                  |
|----------------|------------------------|------------------|
| <i>PRAMEF6</i> | <i>ASGR1</i>           | <i>CCDC91</i>    |
| <i>NHLRC3</i>  | <i>ANXA7</i>           | <i>MKLN1</i>     |
| <i>NBPF20</i>  | <i>CD8B</i>            | <i>C1orf87</i>   |
| <i>GNRH2</i>   | <i>SACM1L</i>          | <i>HDGFL1</i>    |
| <i>IRF5</i>    | <i>C19orf51</i>        | <i>VAX1</i>      |
|                | <i>COL18A1</i>         | <i>C10orf126</i> |
|                | <i>CYP2D7P1</i>        | <i>FBN1</i>      |
|                | <i>ICOS</i>            | <i>DPP4</i>      |
|                | <i>AC138517.4.1</i>    | <i>DDX41</i>     |
|                | <i>PPP4R1L</i>         | <i>CHERP</i>     |
|                | <i>CTD-2009A10.1.1</i> | <i>CALR3</i>     |
|                |                        | <i>MIPEP</i>     |
|                |                        | <i>ATG2B</i>     |
|                |                        | <i>KIAA0913</i>  |
|                |                        | <i>MLXIP</i>     |
|                |                        | <i>SERHL2</i>    |
|                |                        | <i>DLG2</i>      |
|                |                        | <i>RBM46</i>     |
|                |                        | <i>SPICE1</i>    |
|                |                        | <i>HERC6</i>     |
|                |                        | <i>ABCA2</i>     |
|                |                        | <i>APOA2</i>     |
|                |                        | <i>PALLD</i>     |
|                |                        | <i>ZNF600</i>    |
|                |                        | <i>STX3</i>      |
|                |                        | <i>AKAP6</i>     |
|                |                        | <i>KLHL38</i>    |
|                |                        | <i>CDC42BPB</i>  |
|                |                        | <i>WDFY3</i>     |
|                |                        | <i>APOBEC3F</i>  |
|                |                        | <i>GFPT1</i>     |
|                |                        | <i>CDK8</i>      |

| <b>suspected cancer genes</b> |                     |                       |
|-------------------------------|---------------------|-----------------------|
| <b>PG137 dysplasia only</b>   | <b>PG137 shared</b> | <b>PG137 SCC only</b> |
| <i>TBP</i>                    | <i>TP53</i>         | <i>MAML2</i>          |
|                               | <i>LAMC2</i>        | <i>PIK3C2G</i>        |
|                               | <i>RUNX1</i>        | <i>CDC27</i>          |
|                               | <i>CLCF1</i>        | <i>NCOA2</i>          |
|                               | <i>CACNA1B</i>      | <i>ORC5</i>           |
|                               |                     | <i>CACNA1B</i>        |
|                               |                     | <i>ITPR1</i>          |

| <b>other genes/genomic features</b> |                     |                       |
|-------------------------------------|---------------------|-----------------------|
| <b>PG137 dysplasia only</b>         | <b>PG137 shared</b> | <b>PG137 SCC only</b> |
|                                     |                     |                       |

|                |                 |                 |
|----------------|-----------------|-----------------|
| NADSYN1        | ZNF738          | COPS3           |
| CTD-2611K5.6.1 | MUC4            | WDR63           |
| TFCP2          | EHF             | FOXD4L2         |
| AC129778.3.1   | SULT1C4         | TBC1D3G         |
| ABHD8          | GUCY2C          | PHIP            |
| NXF1           | RP11-174G6.1.1  | EP400           |
| NOL8           | AHNAK2          | C18orf34        |
| DSPP           | AHNAK2          | SMARCA2         |
| ANKRD20A3      | NBPF20          | NFKBIZ          |
|                | STK35           | MRPL45          |
|                | MZT2A           | EYS             |
|                | MZT2A           | FAM188B         |
|                | ACSM5           | INMT-FAM188B    |
|                | AC006557.1      | PGAP1           |
|                | RP11-385D13.1.1 | RPL12           |
|                | CDRT1           | NFKBIZ          |
|                | GMNC            | ELMOD2          |
|                | ORM2            | ARHGAP18        |
|                | CNPY1           | NBPF10          |
|                | RAI14           | BBS9            |
|                | FKBP9           | TRAK1           |
|                | GGT3P           | NPTN            |
|                | CHD3            | ANKRD36C        |
|                | AHNAK           | PPIAL4D         |
|                | EPHA7           | AFAP1           |
|                | MUC4            | FRG1B           |
|                | SNF8            | VPS8            |
|                | APOBEC1         | SF3B3           |
|                | FTH1            | DPY19L2P1       |
|                | LTV1            | USO1            |
|                | TECPR1          | TACC3           |
|                | TXNDC3          | AC016773.1      |
|                | BX284650.1.1    | PTPN4           |
|                | TNRC6B          | ADAM7           |
|                | OSGIN1          | RP11-561E1.1.1  |
|                | RP11-505K9.4.1  | RP11-624C23.1.1 |
|                | DPP6            | FAM129B         |
|                | FAM55A          | SNX29           |
|                | PRDM12          | CTA-250D10.15.1 |
|                |                 | FOXN3           |
|                |                 | TM9SF3          |

| suspected cancer genes |              |                |
|------------------------|--------------|----------------|
| PG144 dysplasia only   | PG144 shared | PG144 SCC only |
| SGK1                   | CDC27        | DGKH           |

|        |        |          |
|--------|--------|----------|
| CASP8  | STAT1  | FZD3     |
| NFE2L2 | CSF3R  | KAT2A    |
| VWF    | NOTCH1 | PPP2R2B  |
| MLL3   | POR    | FAT1     |
|        |        | CASP8    |
|        |        | SHH      |
|        |        | NFE2L2   |
|        |        | CACNA1I  |
|        |        | WNT5B    |
|        |        | HIST1H3B |
|        |        | RBL1     |
|        |        | PDE4D    |
|        |        | TEK      |
|        |        | EML4     |
|        |        | AJUBA    |
|        |        | CDKN2A   |
|        |        | ADORA2A  |
|        |        | TBP      |
|        |        | RIMS2    |
|        |        | MYH9     |

| other genes/genomic features |                        |                               |
|------------------------------|------------------------|-------------------------------|
| PG144 dysplasia only         | PG144 shared           | PG144 SCC only                |
| <i>PFAS</i>                  | <i>AC009948.3.1</i>    | <i>XXyac-<br/>YM21GA2.7.1</i> |
| <i>ARHGAP28</i>              | <i>TTN</i>             | <i>AQP7P2</i>                 |
| <i>IRF2BPL</i>               | <i>OR4C5</i>           | <i>RNF44</i>                  |
| <i>HAVCR2</i>                | <i>PVRL3</i>           | <i>PET112</i>                 |
| <i>MANBA</i>                 | <i>NOP16</i>           | <i>ACOX1</i>                  |
| <i>C19orf44</i>              | <i>AGAP6</i>           | <i>AQR</i>                    |
| <i>METTL8</i>                | <i>MYH8</i>            | <i>NEFH</i>                   |
| <i>PDIA2</i>                 | <i>KCNQ5</i>           | <i>MCOLN3</i>                 |
| <i>UNC13C</i>                | <i>RP11-32B5.1.1</i>   | <i>FAM65A</i>                 |
| <i>NBEA</i>                  | <i>WDR52</i>           | <i>FAM65A</i>                 |
| <i>DDX19B</i>                | <i>RP11-293B20.2.1</i> | <i>COL9A1</i>                 |
| <i>ROBO1</i>                 | <i>SLC26A9</i>         | <i>XYLT1</i>                  |
| <i>RP1-310O13.12.1</i>       | <i>PTPRD</i>           | <i>AGAP7</i>                  |
| <i>DPP10</i>                 | <i>RFX6</i>            | <i>WBSCR17</i>                |
| <i>DNAH7</i>                 | <i>STON2</i>           | <i>CTNNA2</i>                 |
| <i>GPR124</i>                | <i>AC126365.1.1</i>    | <i>GLE1</i>                   |
| <i>DNAH1</i>                 | <i>SUV420H1</i>        | <i>GRK4</i>                   |
| <i>PLXNA2</i>                | <i>SRSF7</i>           | <i>TM6SF1</i>                 |
| <i>OR1N2</i>                 | <i>SLC6A9</i>          | <i>RP11-382A20.3.1</i>        |
| <i>GSTM2</i>                 | <i>NUCB1</i>           | <i>CTB-99A3.1.1</i>           |
| <i>NBPF12</i>                | <i>PRAGMIN.1</i>       | <i>SLC36A1</i>                |
| <i>ZNF460</i>                | <i>RIMKLB</i>          | <i>CTDSPL</i>                 |

|                 |                 |                 |
|-----------------|-----------------|-----------------|
| RP11-113A10.1.1 | BSN             | ACADSB          |
| ZDHC17          | RP11-467L19.2.1 | GSR             |
| GPR128          | RP11-63P12.2.1  | CEP63           |
| SGSM1           | SFI1            | CTD-2228K2.2.1  |
| CORO1A          | CLVS2           | AHRR            |
| GPR98           | TRAPPC4         | COX18           |
| SMG1            | NEFH            | WDFY3           |
| ZCCHC8          | PRDM2           | WDFY3-AS1       |
| CCDC81          | PHB2            | BET1L           |
|                 | EMG1            | METTL14         |
|                 | FEZF2           | MEGF8           |
|                 | PHF12           | CEP72           |
|                 | ATP2C1          | TPPP            |
|                 | KLHL24          | MARK4           |
|                 | DCDC5           | ZNF462          |
|                 | CCR5            | TYR             |
|                 | TRAF3IP2        | ARSK            |
|                 | TRAF3IP2-AS1    | DUSP19          |
|                 | TRAF3IP2        | AC064871.3.1    |
|                 | TRAF3IP2-AS1    | TRIM24          |
|                 | MIA3            | ESR2            |
|                 | NOMO3           | RP11-152F13.2.1 |
|                 | CEBPE           | GRSF1           |
|                 | ART3            | FPGS            |
|                 | ADAM29          | BAHCC1          |
|                 |                 | LRGUK           |
|                 |                 | ANKRD35         |
|                 |                 | HEATR7B2        |
|                 |                 | RPS6KC1         |
|                 |                 | RP11-298I3.5.1  |
|                 |                 | NADKD1          |
|                 |                 | PTPRF           |
|                 |                 | WASF3           |
|                 |                 | EFR3B           |
|                 |                 | GFRA1           |
|                 |                 | GAD1            |
|                 |                 | CTA-134P22.2.1  |
|                 |                 | DARC            |
|                 |                 | NBPF20          |
|                 |                 | RRM1            |
|                 |                 | PANK2           |
|                 |                 | PHLDB2          |
|                 |                 | SCARF1          |
|                 |                 | GRB14           |
|                 |                 | AUTS2           |
|                 |                 | RPUSD2          |



|  |  |                    |
|--|--|--------------------|
|  |  | SLC35D1<br>PPP4R1L |
|--|--|--------------------|

| <b>suspected cancer genes</b> |                     |                       |
|-------------------------------|---------------------|-----------------------|
| <b>PG174 dysplasia only</b>   | <b>PG174 shared</b> | <b>PG174 SCC only</b> |
| <i>IST1</i>                   | <i>AJUBA</i>        | <i>LAMA5</i>          |
| <i>C7</i>                     | <i>COL5A1</i>       | <i>IL1R1</i>          |
|                               | <i>CSMD3</i>        | <i>NPY5R</i>          |
|                               | <i>FLG</i>          | <i>CDKN2A</i>         |
|                               | <i>GNA14</i>        | <i>CACNA1A</i>        |
|                               | <i>PLCE1</i>        | <i>CLTC</i>           |
|                               | <i>TP53</i>         | <i>ROCK1</i>          |
|                               | <i>RNF43</i>        |                       |

| <b>other genes/genomic features</b> |                       |                       |
|-------------------------------------|-----------------------|-----------------------|
| <b>PG174 dysplasia only</b>         | <b>PG174 shared</b>   | <b>PG174 SCC only</b> |
| <i>DDX11</i>                        | <i>USH1C</i>          | <i>ARHGEF40</i>       |
| <i>NEFH</i>                         | <i>CCNL2</i>          | <i>OSBPL6</i>         |
| <i>POLR3GL</i>                      | <i>MYL1</i>           | <i>RGL4</i>           |
| <i>ANKDD1A</i>                      | <i>VN1R2</i>          | <i>GUSBP11</i>        |
| <i>C14orf23</i>                     | <i>SLC6A3</i>         | <i>ARHGAP40</i>       |
| <i>MST1</i>                         | <i>STK11IP</i>        | <i>DPP6</i>           |
| <i>KRTAP4-5</i>                     | <i>CCR10</i>          | <i>CCDC57</i>         |
| <i>PI4KAP2</i>                      | <i>OR4C3</i>          | <i>NEFH</i>           |
|                                     | <i>C16orf62</i>       | <i>RP3-377D14.1.1</i> |
|                                     | <i>UNC13A</i>         | <i>PRAMEF5</i>        |
|                                     | <i>ZNF618</i>         | <i>ARMC4</i>          |
|                                     | <i>DAO</i>            | <i>ZNF704</i>         |
|                                     | <i>LARGE</i>          | <i>ASGR1</i>          |
|                                     | <i>IGSF3</i>          | <i>SCAF8</i>          |
|                                     | <i>RP11-764K9.4.1</i> | <i>AQR</i>            |
|                                     | <i>PPM1H</i>          | <i>BMP2K</i>          |
|                                     | <i>TRBV6-7</i>        | <i>ADAM9</i>          |
|                                     | <i>GALM</i>           | <i>FAM40B</i>         |
|                                     | <i>LGR6</i>           | <i>MUC4</i>           |
|                                     | <i>OR9G1</i>          | <i>EPG5</i>           |
|                                     | <i>KANK1</i>          | <i>HABP4</i>          |
|                                     | <i>MEI1</i>           | <i>UBE3C</i>          |
|                                     | <i>PCDH17</i>         | <i>PMS2CL</i>         |
|                                     | <i>ZNF446</i>         | <i>MSH3</i>           |
|                                     | <i>PRDM10</i>         | <i>PCDHB15</i>        |
|                                     | <i>DUOXA2</i>         | <i>SH2B2</i>          |
|                                     | <i>DUOX2</i>          | <i>DDX20</i>          |
|                                     | <i>APOB</i>           | <i>CPNE6</i>          |
|                                     | <i>CCDC154</i>        | <i>ABAT</i>           |

|  |                |                                                                                                                                                                                                                                                                                                                   |
|--|----------------|-------------------------------------------------------------------------------------------------------------------------------------------------------------------------------------------------------------------------------------------------------------------------------------------------------------------|
|  | <i>PI4KAP1</i> | <i>SV2B</i><br><i>FO XK2</i><br><i>MYH3</i><br><i>TNRC18C</i><br><i>TACC3</i><br><i>AC016773.1</i><br><i>ANKRD18A</i><br><i>PRTG</i><br><i>RP11-420M1.2.1</i><br><i>RP1-130H16.18.1</i><br><i>GATSL3</i><br><i>SLC35D1</i><br><i>CRYL1</i><br><i>AL450992.2.1</i><br><i>FO XK2</i><br><i>FGD6</i><br><i>PTPRT</i> |
|--|----------------|-------------------------------------------------------------------------------------------------------------------------------------------------------------------------------------------------------------------------------------------------------------------------------------------------------------------|

| <b>suspected cancer genes</b> |                                                                                             |                            |
|-------------------------------|---------------------------------------------------------------------------------------------|----------------------------|
| <b>PG187 dysplasia only</b>   | <b>PG187 shared</b>                                                                         | <b>PG187 SCC only</b>      |
| <i>TBP</i>                    | <i>CANT1</i><br><i>ZFH X4</i><br><i>TP53</i><br><i>MYH11</i><br><i>LRP5</i><br><i>PBRM1</i> | <i>TBP</i><br><i>CSMD3</i> |

| <b>other genes/genomic features</b> |                     |                        |
|-------------------------------------|---------------------|------------------------|
| <b>PG187 dysplasia only</b>         | <b>PG187 shared</b> | <b>PG187 SCC only</b>  |
| <i>C1orf9</i>                       | <i>MUC12</i>        | <i>ZBTB22</i>          |
| <i>GSG1L</i>                        | <i>USP31</i>        | <i>TP53INP1</i>        |
| <i>GABRB3</i>                       | <i>PPM1E</i>        | <i>ITSN2</i>           |
| <i>NEFH</i>                         | <i>TRIM48</i>       | <i>KLHL2</i>           |
| <i>TUBA1B</i>                       | <i>STAB2</i>        | <i>NEBL</i>            |
| <i>FRMD4A</i>                       | <i>TBKBP1</i>       | <i>C9orf123</i>        |
| <i>NUP153</i>                       | <i>FAM194B</i>      | <i>MYO1B</i>           |
|                                     | <i>MYH6</i>         | <i>TERF1P5</i>         |
|                                     | <i>HIST1H2BD</i>    | <i>RP11-284H19.1.1</i> |
|                                     | <i>BRD1</i>         | <i>EIF5A</i>           |
|                                     | <i>RGS7BP</i>       | <i>FAN1</i>            |
|                                     | <i>TINAG</i>        | <i>GRM6</i>            |
|                                     | <i>IFT122</i>       | <i>RP11-281O15.4.1</i> |
|                                     | <i>LPHN2</i>        | <i>ANO1</i>            |
|                                     | <i>COQ6</i>         | <i>THEG</i>            |
|                                     | <i>DST</i>          | <i>SERHL</i>           |

|  |              |                 |
|--|--------------|-----------------|
|  | ZNF738       | FAM151A         |
|  | AC027763.2.1 | ACOT11          |
|  | ZNF704       | KIAA0368        |
|  | IGHV1-8      | CDR2            |
|  |              | RRN3P3          |
|  |              | GOLGA8A         |
|  |              | RERGL           |
|  |              | RP13-221M14.1.1 |
|  |              | KIR2DL3         |
|  |              | ASB16           |
|  |              | MRV11           |
|  |              | SLC43A2         |
|  |              | ZP3             |
|  |              | SDHAP1          |
|  |              | CKAP2           |
|  |              | DMC1            |
|  |              | TWF1            |
|  |              | HAGH            |
|  |              | ANKRD20A3       |
|  |              | VPS54           |
|  |              | STK31           |
|  |              | AC131180.1      |
|  |              | CNTROB          |
|  |              | CCT5            |
|  |              | AHNAK2          |
|  |              | PTPRN2          |
|  |              | KCTD1           |
|  |              | DTWD2           |

| suspected cancer genes |              |                |
|------------------------|--------------|----------------|
| PG192 dysplasia only   | PG192 shared | PG192 SCC only |
|                        | RANBP17      | CHN1<br>KCTD8  |

| other genes/genomic features |                |                |
|------------------------------|----------------|----------------|
| PG192 dysplasia only         | PG192 shared   | PG192 SCC only |
| OTUD4                        | PARP16         | MPND           |
| ANKRD36C                     | AC104809.3.1   | GAS2L2         |
| OR2L3                        | ANXA2          | PNPLA7         |
| ANKRD18B                     | RP11-22B23.1.1 | SLFN13         |
| BMS1                         | RP11-830F9.6.1 | DDX11          |
| UNC13C                       | GOLGA8J        | NBPF12         |
| UBE2S                        | SNHG5          | SLFN5          |
| ADAMTS2                      | POLR3A         | ZNF717         |
| PARP8                        | CREBZF         | RGL4           |

|                       |                        |                       |
|-----------------------|------------------------|-----------------------|
| <i>FAHD2A</i>         | <i>PRH2</i>            | <i>GUSBP11</i>        |
| <i>POLR2M</i>         | <i>OR3A3</i>           | <i>WDR62</i>          |
| <i>GCOM1</i>          | <i>TJP1</i>            | <i>B4GALT7</i>        |
| <i>KRT10</i>          | <i>NBEA</i>            | <i>WASF2</i>          |
| <i>RP11-356C4.4.1</i> | <i>GOLGA8J</i>         | <i>MUC4</i>           |
| <i>DDX25</i>          | <i>LTBR</i>            | <i>RP11-830F9.6.1</i> |
| <i>PRR4</i>           | <i>CCDC144NL</i>       | <i>U66061.38.1</i>    |
| <i>FCGR2A</i>         | <i>MED15</i>           | <i>TUBGCP6</i>        |
| <i>MYCBP2</i>         | <i>AC006557.1</i>      | <i>CORO7</i>          |
|                       | <i>OR52E4</i>          | <i>AMY2A</i>          |
|                       | <i>NBPF1</i>           | <i>DDX31</i>          |
|                       | <i>PDXDC2P</i>         | <i>CASC3</i>          |
|                       | <i>RP11-106J23.2.1</i> | <i>SLFN5</i>          |
|                       | <i>UTP3</i>            | <i>AC012414.1</i>     |
|                       | <i>IGHV3-74</i>        | <i>UBXN11</i>         |
|                       | <i>TRGV4</i>           | <i>DHX16</i>          |
|                       | <i>BRD9</i>            | <i>CNTNAP3</i>        |
|                       | <i>ZDHHC11</i>         | <i>NBPF11</i>         |
|                       | <i>TNRC18C</i>         | <i>TMEM132B</i>       |
|                       | <i>CCDC74B</i>         | <i>CYTL1</i>          |
|                       | <i>RP11-823P9.1.1</i>  | <i>MPHOSPH8</i>       |
|                       | <i>ANKRD30B</i>        | <i>POU6F2</i>         |
|                       | <i>PRDM13</i>          | <i>SLFN12</i>         |
|                       | <i>TRAP1</i>           | <i>DDX20</i>          |
|                       | <i>RHPN1</i>           | <i>PSG7</i>           |
|                       | <i>UGT2B28</i>         | <i>NBPF3</i>          |
|                       | <i>GPR172A</i>         | <i>ZNF676</i>         |
|                       | <i>APBA1</i>           | <i>MUC20</i>          |
|                       | <i>IGHV3-74</i>        | <i>PSG10P</i>         |
|                       | <i>GOLGA8J</i>         | <i>MUC4</i>           |
|                       |                        | <i>ANKRD30B</i>       |
|                       |                        | <i>SLC39A11</i>       |
|                       |                        | <i>RP11-247C2.1.1</i> |
|                       |                        | <i>GAS2L2</i>         |
|                       |                        | <i>FOXK2</i>          |
|                       |                        | <i>LDB2</i>           |
|                       |                        | <i>KRT8</i>           |
|                       |                        | <i>AC114737.4.1</i>   |
|                       |                        | <i>IGHGP</i>          |
|                       |                        | <i>CORO1B</i>         |
|                       |                        | <i>HOMEZ</i>          |
|                       |                        | <i>HAUS8</i>          |

Table S4 – GO terms significantly enriched from lists of genes. For each patient, the filtered genes mutated only in the dysplasia sample, only in the SCC sample, and shared between the samples were tested.

| PG004 dysplasia only                                                                                                                                                                                                                                                                                                                                                                 | PG004 shared                                                                                                                                                                                                                                                                                                                                                                                                                                                                                                                                                                                                                                                                                                                                                                                                                                                                                                                                                                                                                                                                      | PG004 SCC only                                                                                                                                          |
|--------------------------------------------------------------------------------------------------------------------------------------------------------------------------------------------------------------------------------------------------------------------------------------------------------------------------------------------------------------------------------------|-----------------------------------------------------------------------------------------------------------------------------------------------------------------------------------------------------------------------------------------------------------------------------------------------------------------------------------------------------------------------------------------------------------------------------------------------------------------------------------------------------------------------------------------------------------------------------------------------------------------------------------------------------------------------------------------------------------------------------------------------------------------------------------------------------------------------------------------------------------------------------------------------------------------------------------------------------------------------------------------------------------------------------------------------------------------------------------|---------------------------------------------------------------------------------------------------------------------------------------------------------|
| <p>GO:0005524~ATP binding</p> <p>GO:0032559~adenyl ribonucleotide binding</p> <p>GO:0030554~adenyl nucleotide binding</p> <p>GO:0001883~purine nucleoside binding</p> <p>GO:0001882~nucleoside binding</p> <p>GO:0000166~nucleotide binding</p> <p>GO:0032555~purine ribonucleotide binding</p> <p>GO:0032553~ribonucleotide binding</p> <p>GO:0017076~purine nucleotide binding</p> | <p>GO:0016887~ATPase activity</p> <p>GO:0040029~regulation of gene expression, epigenetic</p> <p>GO:0030286~dynein complex</p> <p>GO:0042995~cell projection</p> <p>GO:0001882~nucleoside binding</p> <p>GO:0030424~axon</p> <p>GO:0005524~ATP binding</p> <p>GO:0032559~adenyl ribonucleotide binding</p> <p>GO:0043005~neuron projection</p> <p>GO:0030554~adenyl nucleotide binding</p> <p>GO:0003810~protein-glutamine gamma-glutamyltransferase activity</p> <p>GO:0001883~purine nucleoside binding</p> <p>GO:0003777~microtubule motor activity</p> <p>GO:0007398~ectoderm development</p> <p>GO:0006349~genetic imprinting</p> <p>GO:0007155~cell adhesion</p> <p>GO:0022610~biological adhesion</p> <p>GO:0045596~negative regulation of cell differentiation</p> <p>GO:0030030~cell projection organization</p> <p>GO:0005887~integral to plasma membrane</p> <p>GO:0005875~microtubule associated complex</p> <p>GO:0043232~intracellular non-membrane-bounded organelle</p> <p>GO:0043228~non-membrane-bounded organelle</p> <p>GO:0060429~epithelium development</p> | <p>GO:0006366~transcription from RNA polymerase II promoter</p> <p>GO:0008188~neuropeptide receptor activity</p> <p>GO:0042923~neuropeptide binding</p> |
| PG038 dysplasia only                                                                                                                                                                                                                                                                                                                                                                 | PG038 shared                                                                                                                                                                                                                                                                                                                                                                                                                                                                                                                                                                                                                                                                                                                                                                                                                                                                                                                                                                                                                                                                      | PG038 SCC only                                                                                                                                          |
|                                                                                                                                                                                                                                                                                                                                                                                      | <p>GO:0000267~cell fraction</p> <p>GO:0005626~insoluble fraction</p> <p>GO:0006917~induction of apoptosis</p> <p>GO:0012502~induction of programmed cell death</p> <p>GO:0006915~apoptosis</p> <p>GO:0012501~programmed cell death</p> <p>GO:0001701~in utero embryonic development</p> <p>GO:0007155~cell adhesion</p> <p>GO:0022610~biological adhesion</p> <p>GO:0006919~activation of caspase activity</p> <p>GO:0008219~cell death</p> <p>GO:0043065~positive regulation of apoptosis</p> <p>GO:0016265~death</p> <p>GO:0043068~positive regulation of programmed cell death</p> <p>GO:0010942~positive regulation of cell death</p>                                                                                                                                                                                                                                                                                                                                                                                                                                         | <p>GO:0009611~response to wounding</p> <p>GO:0035085~cilium axoneme</p> <p>GO:0004252~serine-type endopeptidase activity</p>                            |

|                             |                                                                                                                                                                                                                                                                                                                                                                                                              |                                                                                                                                                                                                                                                                                                                                                                                                                                                                                                                                                                                                                                                                                                                                                                                                                                                                                                                                                                                                                                                                                                                                                                                                                                                                                                                                                                                                     |
|-----------------------------|--------------------------------------------------------------------------------------------------------------------------------------------------------------------------------------------------------------------------------------------------------------------------------------------------------------------------------------------------------------------------------------------------------------|-----------------------------------------------------------------------------------------------------------------------------------------------------------------------------------------------------------------------------------------------------------------------------------------------------------------------------------------------------------------------------------------------------------------------------------------------------------------------------------------------------------------------------------------------------------------------------------------------------------------------------------------------------------------------------------------------------------------------------------------------------------------------------------------------------------------------------------------------------------------------------------------------------------------------------------------------------------------------------------------------------------------------------------------------------------------------------------------------------------------------------------------------------------------------------------------------------------------------------------------------------------------------------------------------------------------------------------------------------------------------------------------------------|
|                             | <p>GO:0010952~positive regulation of peptidase activity</p> <p>GO:0043280~positive regulation of caspase activity</p> <p>GO:0042981~regulation of apoptosis</p> <p>GO:0005624~membrane fraction</p> <p>GO:0043067~regulation of programmed cell death</p> <p>GO:0010941~regulation of cell death</p> <p>GO:0043281~regulation of caspase activity</p> <p>GO:0052548~regulation of endopeptidase activity</p> |                                                                                                                                                                                                                                                                                                                                                                                                                                                                                                                                                                                                                                                                                                                                                                                                                                                                                                                                                                                                                                                                                                                                                                                                                                                                                                                                                                                                     |
| <b>PG049 dysplasia only</b> | <b>PG049 shared</b>                                                                                                                                                                                                                                                                                                                                                                                          | <b>PG049 SCC only</b>                                                                                                                                                                                                                                                                                                                                                                                                                                                                                                                                                                                                                                                                                                                                                                                                                                                                                                                                                                                                                                                                                                                                                                                                                                                                                                                                                                               |
|                             |                                                                                                                                                                                                                                                                                                                                                                                                              | <p>GO:0003044~regulation of systemic arterial blood pressure mediated by a chemical signal</p> <p>GO:0008637~apoptotic mitochondrial changes</p> <p>GO:0007160~cell-matrix adhesion</p> <p>GO:0042826~histone deacetylase binding</p> <p>GO:0005509~calcium ion binding</p> <p>GO:0003073~regulation of systemic arterial blood pressure</p> <p>GO:0031589~cell-substrate adhesion</p> <p>GO:0016529~sarcolemmal reticulum</p> <p>GO:0016528~sarcolemmal</p> <p>GO:0007568~aging</p> <p>GO:0042149~cellular response to glucose starvation</p> <p>GO:0044420~extracellular matrix part</p> <p>GO:0031669~cellular response to nutrient levels</p> <p>GO:0046907~intracellular transport</p> <p>GO:0030705~cytoskeleton-dependent intracellular transport</p> <p>GO:0006518~peptide metabolic process</p> <p>GO:0051336~regulation of hydrolase activity</p> <p>GO:0001666~response to hypoxia</p> <p>GO:0010149~senescence</p> <p>GO:0007005~mitochondrion organization</p> <p>GO:0070482~response to oxygen levels</p> <p>GO:0006816~calcium ion transport</p> <p>GO:0055093~response to hyperoxia</p> <p>GO:0048147~negative regulation of fibroblast proliferation</p> <p>GO:0031668~cellular response to extracellular stimulus</p> <p>GO:0007346~regulation of mitotic cell cycle</p> <p>GO:0006886~intracellular protein transport</p> <p>GO:0043434~response to peptide hormone stimulus</p> |
| <b>PG063 dysplasia only</b> | <b>PG063 shared</b>                                                                                                                                                                                                                                                                                                                                                                                          | <b>PG063 SCC only</b>                                                                                                                                                                                                                                                                                                                                                                                                                                                                                                                                                                                                                                                                                                                                                                                                                                                                                                                                                                                                                                                                                                                                                                                                                                                                                                                                                                               |
|                             |                                                                                                                                                                                                                                                                                                                                                                                                              | <p>GO:0008219~cell death</p> <p>GO:0016265~death</p> <p>GO:0006915~apoptosis</p> <p>GO:0012501~programmed cell death</p> <p>GO:0030182~neuron differentiation</p> <p>GO:0005086~ARF guanyl-nucleotide exchange factor activity</p>                                                                                                                                                                                                                                                                                                                                                                                                                                                                                                                                                                                                                                                                                                                                                                                                                                                                                                                                                                                                                                                                                                                                                                  |

| <b>PG079 dysplasia only</b> | <b>PG079 shared</b>                                                                                                                                                                                                                                                                                                                                                                                                                                                                                                                                                                                                                                                                                                                                                                                                                                                                                                                                                                                                                                                                                                                                                                                                                                                                                                                                                                                                                                                                                                                                                                                                                                                 | <b>PG079 SCC only</b>                                                                                                                                                                                                                                                                                                                                        |
|-----------------------------|---------------------------------------------------------------------------------------------------------------------------------------------------------------------------------------------------------------------------------------------------------------------------------------------------------------------------------------------------------------------------------------------------------------------------------------------------------------------------------------------------------------------------------------------------------------------------------------------------------------------------------------------------------------------------------------------------------------------------------------------------------------------------------------------------------------------------------------------------------------------------------------------------------------------------------------------------------------------------------------------------------------------------------------------------------------------------------------------------------------------------------------------------------------------------------------------------------------------------------------------------------------------------------------------------------------------------------------------------------------------------------------------------------------------------------------------------------------------------------------------------------------------------------------------------------------------------------------------------------------------------------------------------------------------|--------------------------------------------------------------------------------------------------------------------------------------------------------------------------------------------------------------------------------------------------------------------------------------------------------------------------------------------------------------|
|                             | GO:0007242~intracellular signaling cascade                                                                                                                                                                                                                                                                                                                                                                                                                                                                                                                                                                                                                                                                                                                                                                                                                                                                                                                                                                                                                                                                                                                                                                                                                                                                                                                                                                                                                                                                                                                                                                                                                          | GO:0051726~regulation of cell cycle<br>GO:0009314~response to radiation<br>GO:0007155~cell adhesion<br>GO:0022610~biological adhesion                                                                                                                                                                                                                        |
| <b>PG105 dysplasia only</b> | <b>PG105 shared</b>                                                                                                                                                                                                                                                                                                                                                                                                                                                                                                                                                                                                                                                                                                                                                                                                                                                                                                                                                                                                                                                                                                                                                                                                                                                                                                                                                                                                                                                                                                                                                                                                                                                 | <b>PG105 SCC only</b>                                                                                                                                                                                                                                                                                                                                        |
|                             | GO:0044430~cytoskeletal part<br>GO:0005856~cytoskeleton<br>GO:0005815~microtubule organizing center<br>GO:0043228~non-membrane-bounded organelle<br>GO:0043232~intracellular non-membrane-bounded organelle<br>GO:0005874~microtubule                                                                                                                                                                                                                                                                                                                                                                                                                                                                                                                                                                                                                                                                                                                                                                                                                                                                                                                                                                                                                                                                                                                                                                                                                                                                                                                                                                                                                               |                                                                                                                                                                                                                                                                                                                                                              |
| <b>PG108 dysplasia only</b> | <b>PG108 shared</b>                                                                                                                                                                                                                                                                                                                                                                                                                                                                                                                                                                                                                                                                                                                                                                                                                                                                                                                                                                                                                                                                                                                                                                                                                                                                                                                                                                                                                                                                                                                                                                                                                                                 | <b>PG108 SCC only</b>                                                                                                                                                                                                                                                                                                                                        |
|                             | GO:0045893~positive regulation of transcription, DNA-dependent<br>GO:0051254~positive regulation of RNA metabolic process<br>GO:0003682~chromatin binding<br>GO:0045941~positive regulation of transcription<br>GO:0030518~steroid hormone receptor signaling pathway<br>GO:0010628~positive regulation of gene expression<br>GO:0043414~biopolymer methylation<br>GO:0045935~positive regulation of nucleobase, nucleoside, nucleotide and nucleic acid metabolic process<br>GO:0051173~positive regulation of nitrogen compound metabolic process<br>GO:0035257~nuclear hormone receptor binding<br>GO:0030522~intracellular receptor-mediated signaling pathway<br>GO:0032259~methylation<br>GO:0010557~positive regulation of macromolecule biosynthetic process<br>GO:0031328~positive regulation of cellular biosynthetic process<br>GO:0051427~hormone receptor binding<br>GO:0009891~positive regulation of biosynthetic process<br>GO:0006357~regulation of transcription from RNA polymerase II promoter<br>GO:0000122~negative regulation of transcription from RNA polymerase II promoter<br>GO:0008134~transcription factor binding<br>GO:0010629~negative regulation of gene expression<br>GO:0006730~one-carbon metabolic process<br>GO:0010604~positive regulation of macromolecule metabolic process<br>GO:0003712~transcription cofactor activity<br>GO:0045892~negative regulation of transcription, DNA-dependent<br>GO:0051253~negative regulation of RNA metabolic process<br>GO:0045944~positive regulation of transcription from RNA polymerase II promoter<br>GO:0016571~histone methylation<br>GO:0007242~intracellular signaling cascade | GO:0006351~transcription, DNA-dependent<br>GO:0032774~RNA biosynthetic process<br>GO:0022604~regulation of cell morphogenesis<br>GO:0043232~intracellular non-membrane-bounded organelle<br>GO:0043228~non-membrane-bounded organelle<br>GO:0051130~positive regulation of cellular component organization<br>GO:0046982~protein heterodimerization activity |

| PG122 dysplasia only                                                                                                                                                                                                                                                                                                                                                                                                    | PG122 shared                    | PG122 SCC only                                                                                                                                                                                                                                                                                                                                                                                                                                                                                                                                                                                                                                                                                                                                                                                                                                                                                                                                                                                                                                                                                                                                                      |
|-------------------------------------------------------------------------------------------------------------------------------------------------------------------------------------------------------------------------------------------------------------------------------------------------------------------------------------------------------------------------------------------------------------------------|---------------------------------|---------------------------------------------------------------------------------------------------------------------------------------------------------------------------------------------------------------------------------------------------------------------------------------------------------------------------------------------------------------------------------------------------------------------------------------------------------------------------------------------------------------------------------------------------------------------------------------------------------------------------------------------------------------------------------------------------------------------------------------------------------------------------------------------------------------------------------------------------------------------------------------------------------------------------------------------------------------------------------------------------------------------------------------------------------------------------------------------------------------------------------------------------------------------|
|                                                                                                                                                                                                                                                                                                                                                                                                                         | GO:0048878~chemical homeostasis | GO:0016447~somatic recombination of immunoglobulin gene segments<br>GO:0016445~somatic diversification of immunoglobulins<br>GO:0008134~transcription factor binding<br>GO:0007507~heart development<br>GO:0002562~somatic diversification of immune receptors via germline recombination within a single locus<br>GO:0016444~somatic cell DNA recombination<br>GO:0002200~somatic diversification of immune receptors<br>GO:0002377~immunoglobulin production<br>GO:0060341~regulation of cellular localization<br>GO:0002440~production of molecular mediator of immune response<br>GO:0002520~immune system development<br>GO:0001775~cell activation                                                                                                                                                                                                                                                                                                                                                                                                                                                                                                            |
| PG123 dysplasia only                                                                                                                                                                                                                                                                                                                                                                                                    | PG123 shared                    | PG123 SCC only                                                                                                                                                                                                                                                                                                                                                                                                                                                                                                                                                                                                                                                                                                                                                                                                                                                                                                                                                                                                                                                                                                                                                      |
| GO:0010558~negative regulation of macromolecule biosynthetic process<br>GO:0031327~negative regulation of cellular biosynthetic process<br>GO:0009890~negative regulation of biosynthetic process<br>GO:0010605~negative regulation of macromolecule metabolic process<br>GO:0005829~cytosol<br>GO:0007568~aging<br>GO:0001701~in utero embryonic development<br>GO:0045596~negative regulation of cell differentiation |                                 | GO:0006816~calcium ion transport<br>GO:0050839~cell adhesion molecule binding<br>GO:0050767~regulation of neurogenesis<br>GO:0005626~insoluble fraction<br>GO:0015674~di-, tri-valent inorganic cation transport<br>GO:0016337~cell-cell adhesion<br>GO:0030324~lung development<br>GO:0030323~respiratory tube development<br>GO:0051960~regulation of nervous system development<br>GO:0060541~respiratory system development<br>GO:0060284~regulation of cell development<br>GO:0000267~cell fraction<br>GO:0005624~membrane fraction<br>GO:0014701~junctional sarcoplasmic reticulum membrane<br>GO:0035295~tube development<br>GO:0007406~negative regulation of neuroblast proliferation<br>GO:0001889~liver development<br>GO:0001666~response to hypoxia<br>GO:0043566~structure-specific DNA binding<br>GO:0009416~response to light stimulus<br>GO:0070482~response to oxygen levels<br>GO:0042592~homeostatic process<br>GO:0045765~regulation of angiogenesis<br>GO:0030003~cellular cation homeostasis<br>GO:0019898~extrinsic to membrane<br>GO:0006873~cellular ion homeostasis<br>GO:0042383~sarcolemma<br>GO:0055082~cellular chemical homeostasis |
| PG129 dysplasia only                                                                                                                                                                                                                                                                                                                                                                                                    | PG129 shared                    | PG129 SCC only                                                                                                                                                                                                                                                                                                                                                                                                                                                                                                                                                                                                                                                                                                                                                                                                                                                                                                                                                                                                                                                                                                                                                      |



|                                                                                                                                                                                                                                                                                                                  |                                                                                                                                                                                                                                                                                                                                                                                                                                                                                              |                                                                                                                                                                                                                                                                                                                                                                                                                                                                                                                 |
|------------------------------------------------------------------------------------------------------------------------------------------------------------------------------------------------------------------------------------------------------------------------------------------------------------------|----------------------------------------------------------------------------------------------------------------------------------------------------------------------------------------------------------------------------------------------------------------------------------------------------------------------------------------------------------------------------------------------------------------------------------------------------------------------------------------------|-----------------------------------------------------------------------------------------------------------------------------------------------------------------------------------------------------------------------------------------------------------------------------------------------------------------------------------------------------------------------------------------------------------------------------------------------------------------------------------------------------------------|
|                                                                                                                                                                                                                                                                                                                  | <p>GO:0044459~plasma membrane part</p> <p>GO:0051057~positive regulation of small GTPase mediated signal transduction</p> <p>GO:0046982~protein heterodimerization activity</p> <p>GO:0008235~metalloexopeptidase activity</p>                                                                                                                                                                                                                                                               | <p>GO:0030554~adenyl nucleotide binding</p> <p>GO:0001883~purine nucleoside binding</p> <p>GO:0048471~perinuclear region of cytoplasm</p> <p>GO:0001882~nucleoside binding</p> <p>GO:0042692~muscle cell differentiation</p> <p>GO:0001666~response to hypoxia</p> <p>GO:0070482~response to oxygen levels</p> <p>GO:0000166~nucleotide binding</p> <p>GO:0005524~ATP binding</p> <p>GO:0032559~adenyl ribonucleotide binding</p> <p>GO:0017076~purine nucleotide binding</p> <p>GO:0042277~peptide binding</p> |
| <b>PG136 dysplasia only</b>                                                                                                                                                                                                                                                                                      | <b>PG136 shared</b>                                                                                                                                                                                                                                                                                                                                                                                                                                                                          | <b>PG136 SCC only</b>                                                                                                                                                                                                                                                                                                                                                                                                                                                                                           |
| <p>GO:0004252~serine-type endopeptidase activity</p>                                                                                                                                                                                                                                                             | <p>GO:0009897~external side of plasma membrane</p> <p>GO:0005887~integral to plasma membrane</p> <p>GO:0031226~intrinsic to plasma membrane</p> <p>GO:0012505~endomembrane system</p> <p>GO:0006970~response to osmotic stress</p> <p>GO:0009986~cell surface</p> <p>GO:0005509~calcium ion binding</p> <p>GO:0009628~response to abiotic stimulus</p> <p>GO:0006898~receptor-mediated endocytosis</p>                                                                                       | <p>GO:0002697~regulation of immune effector process</p> <p>GO:0048471~perinuclear region of cytoplasm</p> <p>GO:0006886~intracellular protein transport</p> <p>GO:0046907~intracellular transport</p> <p>GO:0032371~regulation of sterol transport</p> <p>GO:0032374~regulation of cholesterol transport</p> <p>GO:0034613~cellular protein localization</p> <p>GO:0070727~cellular macromolecule localization</p> <p>GO:0015031~protein transport</p>                                                          |
| <b>PG137 dysplasia only</b>                                                                                                                                                                                                                                                                                      | <b>PG137 shared</b>                                                                                                                                                                                                                                                                                                                                                                                                                                                                          | <b>PG137 SCC only</b>                                                                                                                                                                                                                                                                                                                                                                                                                                                                                           |
|                                                                                                                                                                                                                                                                                                                  | <p>GO:0005524~ATP binding</p> <p>GO:0032559~adenyl ribonucleotide binding</p> <p>GO:0030554~adenyl nucleotide binding</p> <p>GO:0001883~purine nucleoside binding</p> <p>GO:0001882~nucleoside binding</p> <p>GO:0032555~purine ribonucleotide binding</p> <p>GO:0032553~ribonucleotide binding</p> <p>GO:0000166~nucleotide binding</p> <p>GO:0017076~purine nucleotide binding</p> <p>GO:0043525~positive regulation of neuron apoptosis</p> <p>GO:0010332~response to gamma radiation</p> | <p>GO:0035091~phosphoinositide binding</p> <p>GO:0043232~intracellular non-membrane-bounded organelle</p> <p>GO:0043228~non-membrane-bounded organelle</p> <p>GO:0006886~intracellular protein transport</p> <p>GO:0034613~cellular protein localization</p> <p>GO:0070727~cellular macromolecule localization</p> <p>GO:0005543~phospholipid binding</p>                                                                                                                                                       |
| <b>PG144 dysplasia only</b>                                                                                                                                                                                                                                                                                      | <b>PG144 shared</b>                                                                                                                                                                                                                                                                                                                                                                                                                                                                          | <b>PG144 SCC only</b>                                                                                                                                                                                                                                                                                                                                                                                                                                                                                           |
| <p>GO:0048870~cell motility</p> <p>GO:0051674~localization of cell</p> <p>GO:0006928~cell motion</p> <p>GO:0005886~plasma membrane</p> <p>GO:0007218~neuropeptide signaling pathway</p> <p>GO:0005858~axonemal dynein complex</p> <p>GO:0001539~ciliary or flagellar motility</p> <p>GO:0044447~axoneme part</p> | <p>GO:0043232~intracellular non-membrane-bounded organelle</p> <p>GO:0043228~non-membrane-bounded organelle</p> <p>GO:0005730~nucleolus</p>                                                                                                                                                                                                                                                                                                                                                  | <p>GO:0000226~microtubule cytoskeleton organization</p> <p>GO:0007017~microtubule-based process</p> <p>GO:0048585~negative regulation of response to stimulus</p> <p>GO:0043005~neuron projection</p> <p>GO:0016331~morphogenesis of embryonic epithelium</p> <p>GO:0070271~protein complex biogenesis</p> <p>GO:0006461~protein complex assembly</p> <p>GO:0065003~macromolecular complex assembly</p>                                                                                                         |

|                                    |                                                                                                                                                                                                                                                                                                                                                                                                                                                                                                                                                                                                                                                               |                                                                                                                                                                                                                                                                                                                                                                                                                                                                                                                                                                                                                                                                                                                                                                                                                                                                                                                                                                                                                                                                                                                                                                                                                                                                                                                                                                                                                            |
|------------------------------------|---------------------------------------------------------------------------------------------------------------------------------------------------------------------------------------------------------------------------------------------------------------------------------------------------------------------------------------------------------------------------------------------------------------------------------------------------------------------------------------------------------------------------------------------------------------------------------------------------------------------------------------------------------------|----------------------------------------------------------------------------------------------------------------------------------------------------------------------------------------------------------------------------------------------------------------------------------------------------------------------------------------------------------------------------------------------------------------------------------------------------------------------------------------------------------------------------------------------------------------------------------------------------------------------------------------------------------------------------------------------------------------------------------------------------------------------------------------------------------------------------------------------------------------------------------------------------------------------------------------------------------------------------------------------------------------------------------------------------------------------------------------------------------------------------------------------------------------------------------------------------------------------------------------------------------------------------------------------------------------------------------------------------------------------------------------------------------------------------|
| <p>GO:0035085~cilium axoneme</p>   |                                                                                                                                                                                                                                                                                                                                                                                                                                                                                                                                                                                                                                                               | <p>GO:0002009~morphogenesis of an epithelium</p> <p>GO:0007010~cytoskeleton organization</p> <p>GO:0043933~macromolecular complex subunit organization</p> <p>GO:0001841~neural tube formation</p> <p>GO:0050868~negative regulation of T cell activation</p> <p>GO:0001838~embryonic epithelial tube formation</p> <p>GO:0042995~cell projection</p> <p>GO:0035148~tube lumen formation</p> <p>GO:0007267~cell-cell signaling</p> <p>GO:0008285~negative regulation of cell proliferation</p> <p>GO:0051250~negative regulation of lymphocyte activation</p> <p>GO:0005856~cytoskeleton</p> <p>GO:0002695~negative regulation of leukocyte activation</p> <p>GO:0005739~mitochondrion</p> <p>GO:0050866~negative regulation of cell activation</p> <p>GO:0016337~cell-cell adhesion</p> <p>GO:0060562~epithelial tube morphogenesis</p> <p>GO:0021915~neural tube development</p> <p>GO:0030424~axon</p> <p>GO:0006351~transcription, DNA-dependent</p> <p>GO:0032774~RNA biosynthetic process</p> <p>GO:0043068~positive regulation of programmed cell death</p> <p>GO:0015630~microtubule cytoskeleton</p> <p>GO:0010942~positive regulation of cell death</p> <p>GO:0048708~astrocyte differentiation</p> <p>GO:0060134~prepulse inhibition</p> <p>GO:0043025~cell soma</p> <p>GO:0048729~tissue morphogenesis</p> <p>GO:0050660~FAD binding</p> <p>GO:0046636~negative regulation of alpha-beta T cell activation</p> |
| <p><b>PG174 dysplasia only</b></p> | <p><b>PG174 shared</b></p>                                                                                                                                                                                                                                                                                                                                                                                                                                                                                                                                                                                                                                    | <p><b>PG174 SCC only</b></p>                                                                                                                                                                                                                                                                                                                                                                                                                                                                                                                                                                                                                                                                                                                                                                                                                                                                                                                                                                                                                                                                                                                                                                                                                                                                                                                                                                                               |
|                                    | <p>GO:0007186~G-protein coupled receptor protein signaling pathway</p> <p>GO:0005886~plasma membrane</p> <p>GO:0019725~cellular homeostasis</p> <p>GO:0030003~cellular cation homeostasis</p> <p>GO:0042592~homeostatic process</p> <p>GO:0048878~chemical homeostasis</p> <p>GO:0055080~cation homeostasis</p> <p>GO:0007204~elevation of cytosolic calcium ion concentration</p> <p>GO:0051480~cytosolic calcium ion homeostasis</p> <p>GO:0019957~C-C chemokine binding</p> <p>GO:0016493~C-C chemokine receptor activity</p> <p>GO:0006873~cellular ion homeostasis</p> <p>GO:0055082~cellular chemical homeostasis</p> <p>GO:0050801~ion homeostasis</p> | <p>GO:0060341~regulation of cellular localization</p> <p>GO:0007010~cytoskeleton organization</p> <p>GO:0032300~mismatch repair complex</p> <p>GO:0030031~cell projection assembly</p> <p>GO:0007160~cell-matrix adhesion</p> <p>GO:0030029~actin filament-based process</p> <p>GO:0043523~regulation of neuron apoptosis</p> <p>GO:0031589~cell-substrate adhesion</p> <p>GO:0007155~cell adhesion</p> <p>GO:0022610~biological adhesion</p> <p>GO:0016337~cell-cell adhesion</p> <p>GO:0019899~enzyme binding</p> <p>GO:0007268~synaptic transmission</p> <p>GO:0042803~protein homodimerization activity</p>                                                                                                                                                                                                                                                                                                                                                                                                                                                                                                                                                                                                                                                                                                                                                                                                            |

|                                                         |                                                                                                                                                                                                                                                                                                                                                                                                                                                                                                                                                                                                  |                                                                                                                                                                                                                                                                                                                                                                                                                        |
|---------------------------------------------------------|--------------------------------------------------------------------------------------------------------------------------------------------------------------------------------------------------------------------------------------------------------------------------------------------------------------------------------------------------------------------------------------------------------------------------------------------------------------------------------------------------------------------------------------------------------------------------------------------------|------------------------------------------------------------------------------------------------------------------------------------------------------------------------------------------------------------------------------------------------------------------------------------------------------------------------------------------------------------------------------------------------------------------------|
|                                                         | <p>GO:0004950~chemokine receptor activity</p> <p>GO:0006874~cellular calcium ion homeostasis</p> <p>GO:0019956~chemokine binding</p>                                                                                                                                                                                                                                                                                                                                                                                                                                                             | <p>GO:0030155~regulation of cell adhesion</p> <p>GO:0016447~somatic recombination of immunoglobulin gene segments</p> <p>GO:0030983~mismatched DNA binding</p> <p>GO:0007167~enzyme linked receptor protein signaling pathway</p> <p>GO:0019226~transmission of nerve impulse</p>                                                                                                                                      |
| <b>PG187 dysplasia only</b>                             | <b>PG187 shared</b>                                                                                                                                                                                                                                                                                                                                                                                                                                                                                                                                                                              | <b>PG187 SCC only</b>                                                                                                                                                                                                                                                                                                                                                                                                  |
| <p>GO:0000226~microtubule cytoskeleton organization</p> | <p>GO:0048739~cardiac muscle fiber development</p> <p>GO:0032982~myosin filament</p> <p>GO:0005859~muscle myosin complex</p> <p>GO:0016460~myosin II complex</p> <p>GO:0051276~chromosome organization</p> <p>GO:0030239~myofibril assembly</p> <p>GO:0007507~heart development</p> <p>GO:0031032~actomyosin structure organization</p> <p>GO:0030036~actin cytoskeleton organization</p> <p>GO:0015629~actin cytoskeleton</p> <p>GO:0030029~actin filament-based process</p> <p>GO:0048747~muscle fiber development</p> <p>GO:0010927~cellular component assembly involved in morphogenesis</p> | <p>GO:0003779~actin binding</p> <p>GO:0008092~cytoskeletal protein binding</p>                                                                                                                                                                                                                                                                                                                                         |
| <b>PG192 dysplasia only</b>                             | <b>PG192 shared</b>                                                                                                                                                                                                                                                                                                                                                                                                                                                                                                                                                                              | <b>PG192 SCC only</b>                                                                                                                                                                                                                                                                                                                                                                                                  |
|                                                         | <p>GO:0005546~phosphatidylinositol-4,5-bisphosphate binding</p>                                                                                                                                                                                                                                                                                                                                                                                                                                                                                                                                  | <p>GO:0070035~purine NTP-dependent helicase activity</p> <p>GO:0008026~ATP-dependent helicase activity</p> <p>GO:0004386~helicase activity</p> <p>GO:0005856~cytoskeleton</p> <p>GO:0043232~intracellular non-membrane-bounded organelle</p> <p>GO:0043228~non-membrane-bounded organelle</p> <p>GO:0042623~ATPase activity, coupled</p> <p>GO:0016887~ATPase activity</p> <p>GO:0007010~cytoskeleton organization</p> |
